# Supplementary material for: A phosphine-mediated domino sequence of salicylaldehyde with but-3-yn-2-one: rapid access to chromanone
Source: Royal Society of Chemistry journal article supplement (doi:10.1039/d0ob01588a), 2020-01-01
Supplement: d0ob01588a1.pdf [file d0ob01588a1.pdf]

## SUPPORTING INFORMATION

### **Phosphine-mediated Domino Sequence of Salicylaldehyde with But-3-yn-2-one: Rapid Access to Chromanone**

Zhen-Zhen Xie,<sup>a</sup> Zhi-Xiong Deng,<sup>a</sup> Yu Zheng,<sup>a</sup> Yan-Shan Chen,<sup>a</sup> Jun-An Xiao,<sup>b</sup> Kai Chen,<sup>a</sup> Hao-Yue Xiang,<sup>\*a</sup> Hua Yang<sup>\*a, c</sup>

<sup>a</sup> College of Chemistry and Chemical Engineering, Central South University, Changsha, 410083, P. R. China. e-mail: [hyangchem@csu.edu.cn](mailto:hyangchem@csu.edu.cn); [xianghaoyue@csu.edu.cn](mailto:xianghaoyue@csu.edu.cn)

<sup>b</sup> College of Chemistry and Material Science, Nanning Normal University, Nanning 530001, Guangxi, P. R. China

<sup>c</sup> Key Laboratory of Hunan Province for Water Environment and Agriculture Product Safety, Central South University, Changsha 410083, P. R. China

## Table of Contents

|                                                                                        |     |
|----------------------------------------------------------------------------------------|-----|
| 1. General Information.....                                                            | S1  |
| 2. Scale-up Experiment.....                                                            | S1  |
| 3. Table S1. Investigation of asymmetric synthesis.....                                | S1  |
| 4. Scheme S1. Investigation of the substrate scope for yones. ....                     | S2  |
| 5. Mechanistic studies.....                                                            | S2  |
| 6. Characterization data of compounds (3).....                                         | S7  |
| 7. <sup>1</sup> H NMR, <sup>13</sup> C NMR of compounds (3) .....                      | S14 |
| 8. Crystal structure of product 3s (CCDC: 1948700) for absolute determination<br>..... | S38 |

## 1. General Information

Unless otherwise noted, all solvents and reagents were purchased from commercial suppliers and used without further purification. Flash chromatography was carried out on silic gel (200-300 mesh, Petroleum Ether/EtOAc solvent systems).  $^1\text{H}$  NMR spectra were recorded at 400 MHz. The chemical shifts were recorded in ppm relative to tetramethylsilane and with the solvent resonance as the internal standard. Data were reported as follows: chemical shift, multiplicity (s, single; d, doublet; t, triplet; m, multiplet), coupling constants (Hz), integration.  $^{13}\text{C}$  NMR data were collected at 100 MHz with complete proton decoupling. Chemical shifts are reported in ppm from the tetramethylsilane with the solvent resonance as an internal standard. Infrared spectra (IR) were measured by FT-IR apparatus. High resolution mass spectroscopy (HRMS) was recorded on TOF MS ES+ Mass spectrometer and acetonitrile was used to dissolve the sample.

## 2. Scale-up Experiment

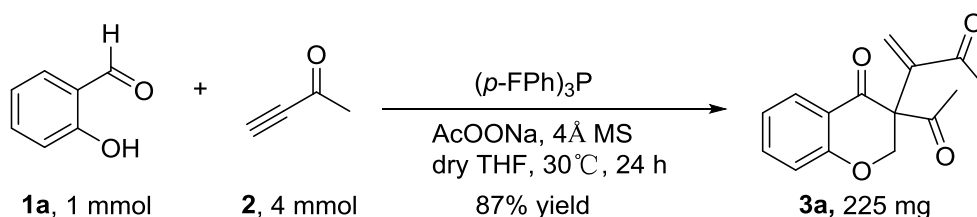

Sodium acetate (0.5 mmol, 41 mg, 0.5 equiv.) and 4 Å MS (250 mg) were added to a solution of salicylic aldehydes **1a** (1.0 mmol, 122 mg, 1.0 equiv.) and  $(p\text{-FPh})_3\text{P}$  (0.5 mmol, 158 mg, 0.5 equiv.) in anhydrous THF (5.0 mL). After well-mixed, but-3-yn-2-one **2** (2.5 mmol, 170 mg, 2.5 equiv.) was added and the resulting mixture was stirred at 30 °C for 12 h. Subsequently, another portion of **2** (1.5 mmol, 102 mg, 1.5 equiv.) and  $(p\text{-FPh})_3\text{P}$  (0.2 mmol, 63 mg, 0.2 equiv.) were added and reacted for an additional 12 h. Following, the solvent was concentrated under reduced pressure and the residue was purified by flash chromatography using silica gel (EtOAc/PE = 1:9) to obtain the product **3a**.

## 3. Table S1. Investigation of asymmetric synthesis

Several chiral phosphine catalyst including (*S*)-(-)-BINAP, (*S*)-(-)-TolBINAP and (-)-DIOP were also investigated, but only giving 4-hydroxy-4*H*-chromene **4a** as product. The results are summarized in Table **S1** (entries 1-3). Additionally, we also tried to

test the ee value of the obtained 4-hydroxy-4*H*-chromene **4a**. However, at current stage, the enantiomers of 4-hydroxy-4*H*-chromene **4a** could not be separated by a set of chiral column including IG, IA, OD-H, OJ-H, AD-H.

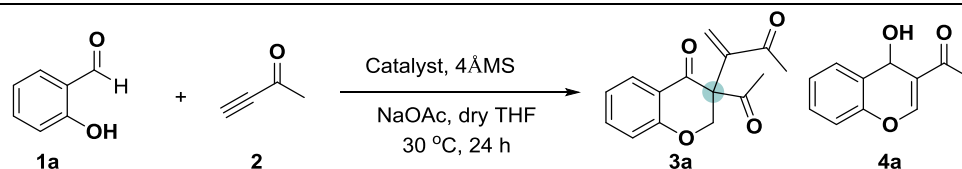

| Entry | Solvent | Catalyst                  | Additive     | T (°C) | Yield (4/3a) | ee |
|-------|---------|---------------------------|--------------|--------|--------------|----|
| 1     | Dry THF | ( <i>S</i> )-(-)-BINAP    | 4Å MS, NaOAc | 30     | 65/0         | -- |
| 2     | Dry THF | ( <i>S</i> )-(-)-TolBINAP | 4Å MS, NaOAc | 30     | 70/0         | -- |
| 3     | Dry THF | (-)-DIOP                  | 4Å MS, NaOAc | 30     | 61/0         | -- |

<sup>a</sup>Unless otherwise noted, reaction were performed with : **1a** (1.0 equiv, 0.2 mmol), **2** (2.5 equiv, 0.5 mmol), 4Å MS (50 mg), NaOAc (0.5 equiv, 0.1 mmol) and Catalyst (0.2 equiv, 0.04 mmol) in anhydrous THF (1.0 ml) at 30 °C for 12 h, and then another portion of **2** (1.5 equiv, 0.3 mmol) and catalyst (15 mmol%, 0.03 mmol) were added and stirred at 30 °C for an additional 12 h, isolated yield.

#### 4. Scheme S1. Investigation of the substrate scope for yones.

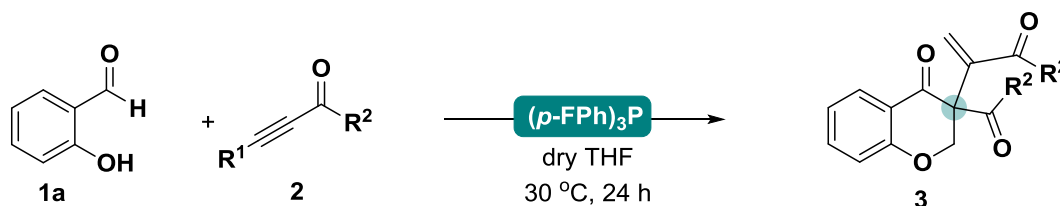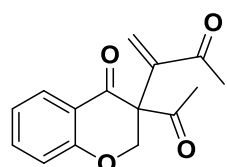

$R^1 = \text{TMS}; R^2 = \text{Me}$   
62%

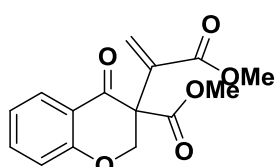

$R^1 = \text{H}; R^2 = \text{CO}_2\text{Me}$   
nr.

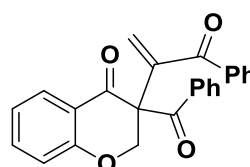

$R^1 = \text{H}; R^2 = \text{Ph}$   
nd.

#### 5. Mechanistic studies

*In situ* <sup>31</sup>P NMR

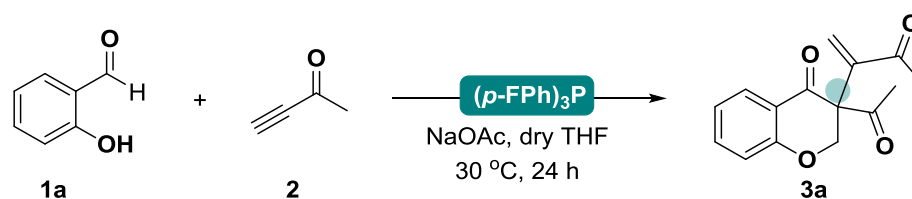

One designated reaction were set up parallelly according to the following conditions: Sodium acetate (0.2 mmol, 0.5 equiv) was added to a solution of salicylaldehyde **1a** (0.4 mmol, 1.0 equiv) and (*p*-FPh)<sub>3</sub>P (0.2 mmol, 0.5 equiv) in anhydrous THF (2.0 mL). But-3-yn-2-one **2** (1.0 mmol, 2.5 equiv) was then added and the resulting mixture was stirred at 30 °C. The reaction was stopped over time interval of 5 min, 30 min, 1 h, 2 h, 6 h, 18 h. The reaction solution was analyzed by <sup>31</sup>P NMR in CDCl<sub>3</sub>.

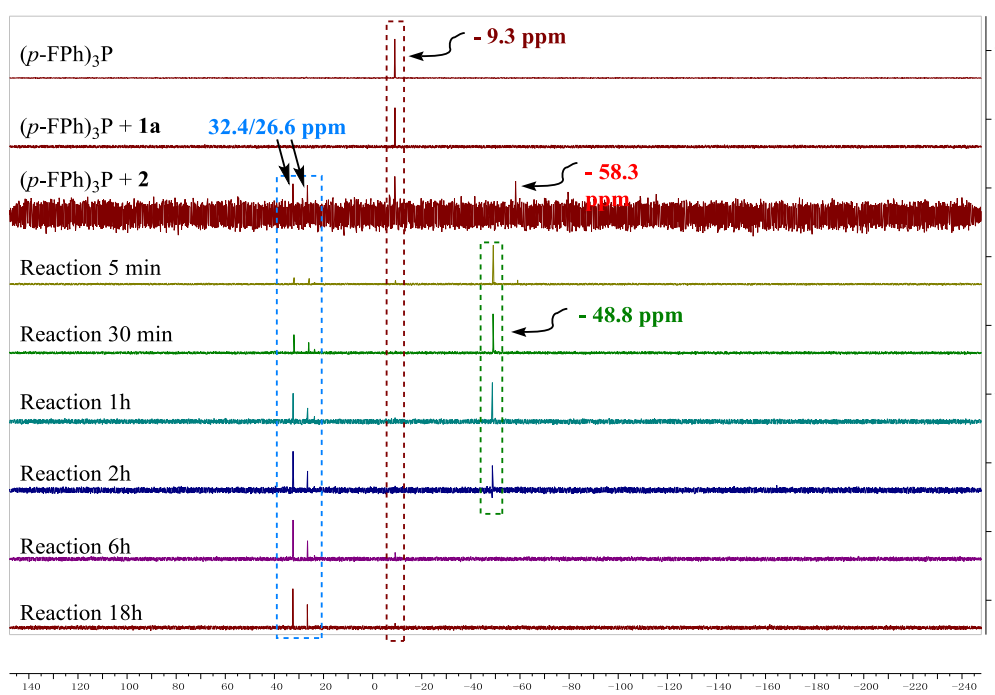

**Figure S1.** *In situ* <sup>31</sup>P NMR studies

*In situ* NMR monitoring:

<sup>1</sup>H NMR:

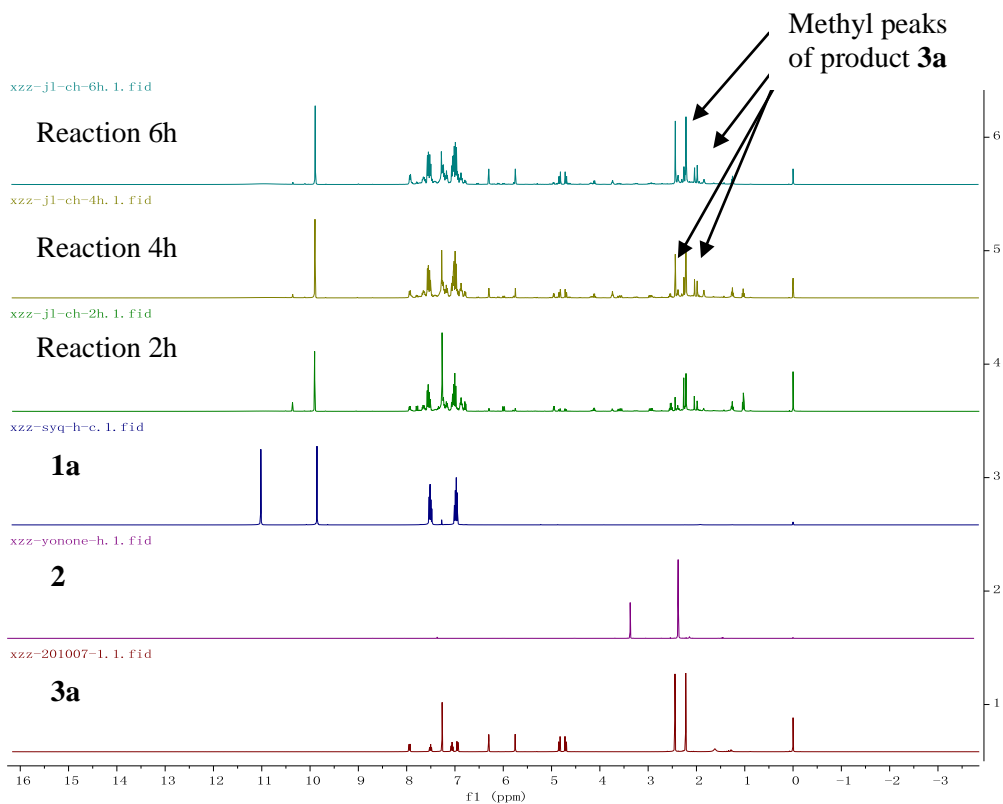

**<sup>13</sup>C NMR:**

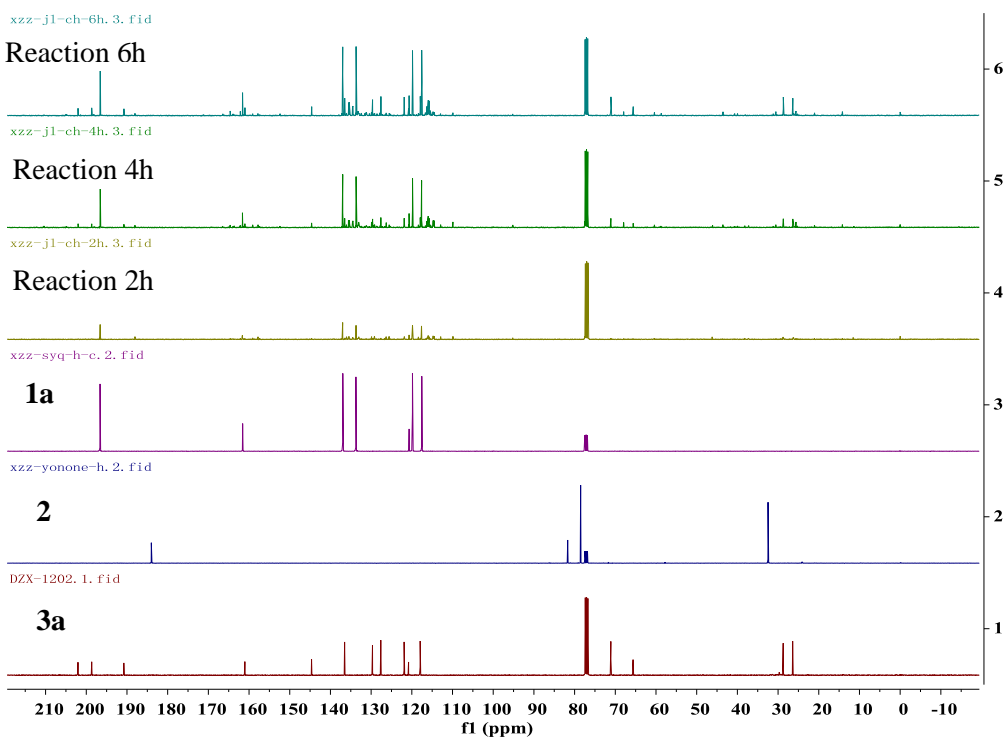

**<sup>31</sup>P NMR:**

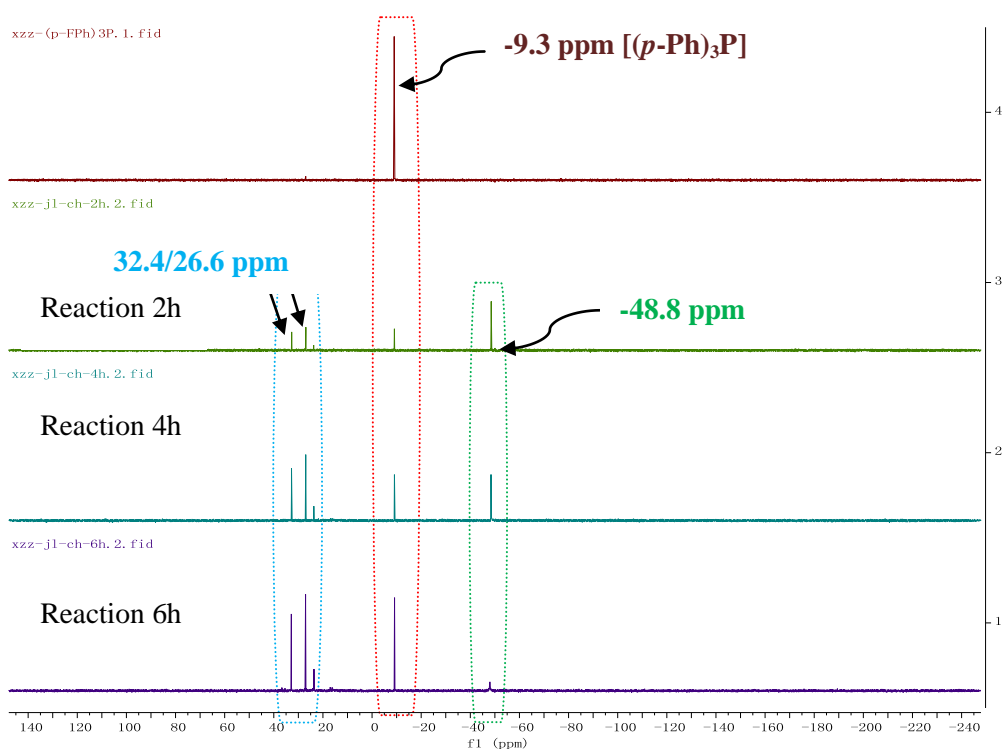

### Labelling Experiments

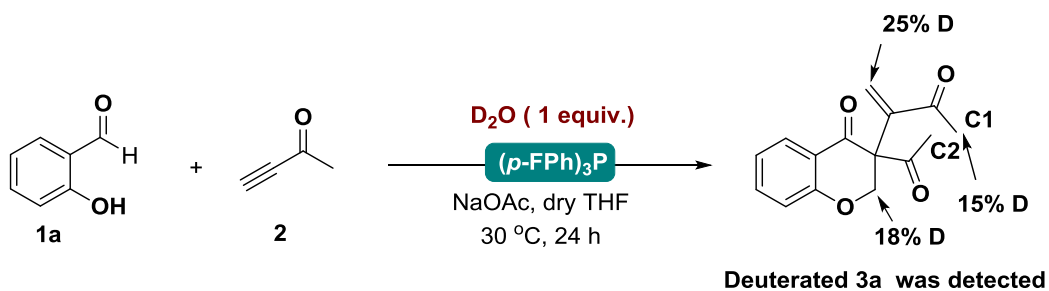

One designated reaction was set up according to the general procedure, but replacing 4 Å MS with 1.0 equiv of D<sub>2</sub>O. And the corresponding deuterated product was detected by <sup>1</sup>H NMR and HRMS.

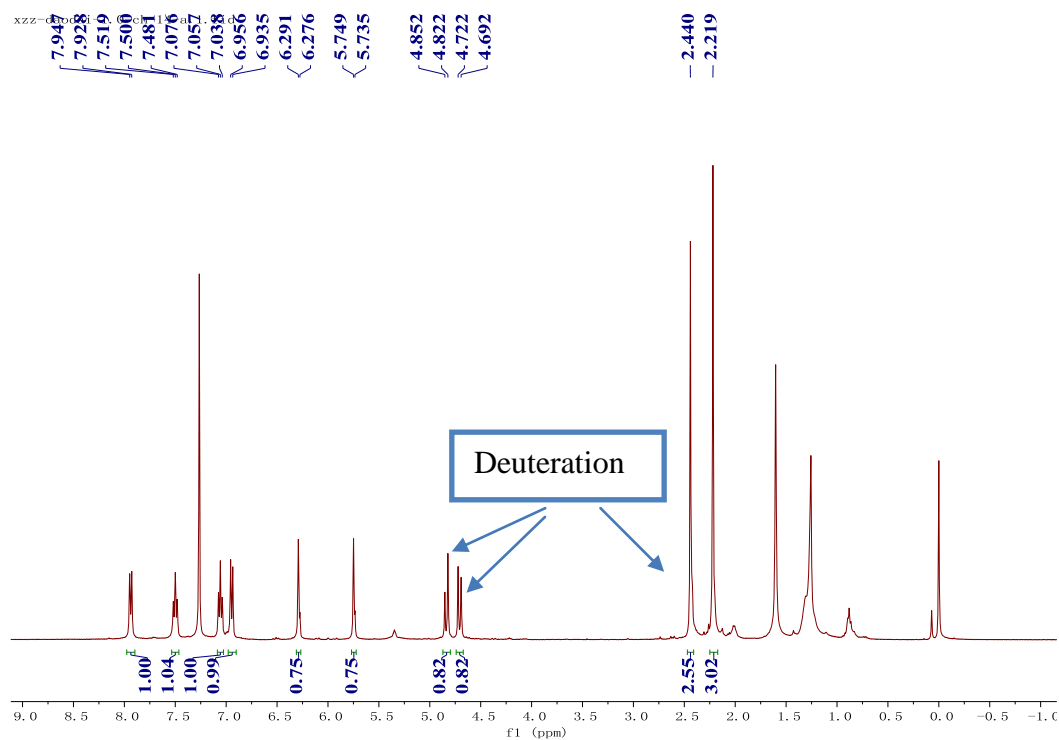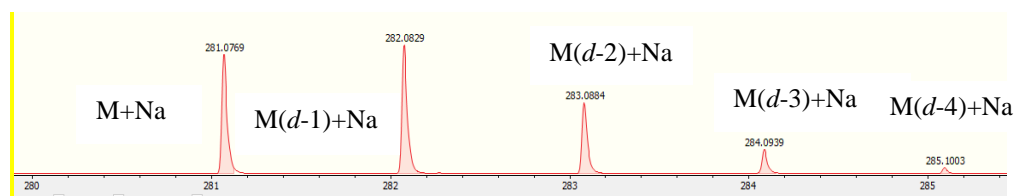

Another designated reaction was set up parallelly according to the following conditions: (*p*-FPh)<sub>3</sub>P (0.1 mmol, 0.5 equiv) was added to a solution of product **3a** (0.2 mmol, 1.0 equiv), D<sub>2</sub>O (0.2 mmol, 1.0 equiv), sodium acetate (0.1 mmol, 0.5 equiv) in anhydrous THF (1.0 mL). The resulting mixture was stirred at 30 °C for 12 h. the solvent was concentrated under reduced pressure and the residue was purified by flash chromatography using silica gel (EtOAc/PE =1:9). No deuterated on product of **3a** was detected by <sup>1</sup>H NMR.



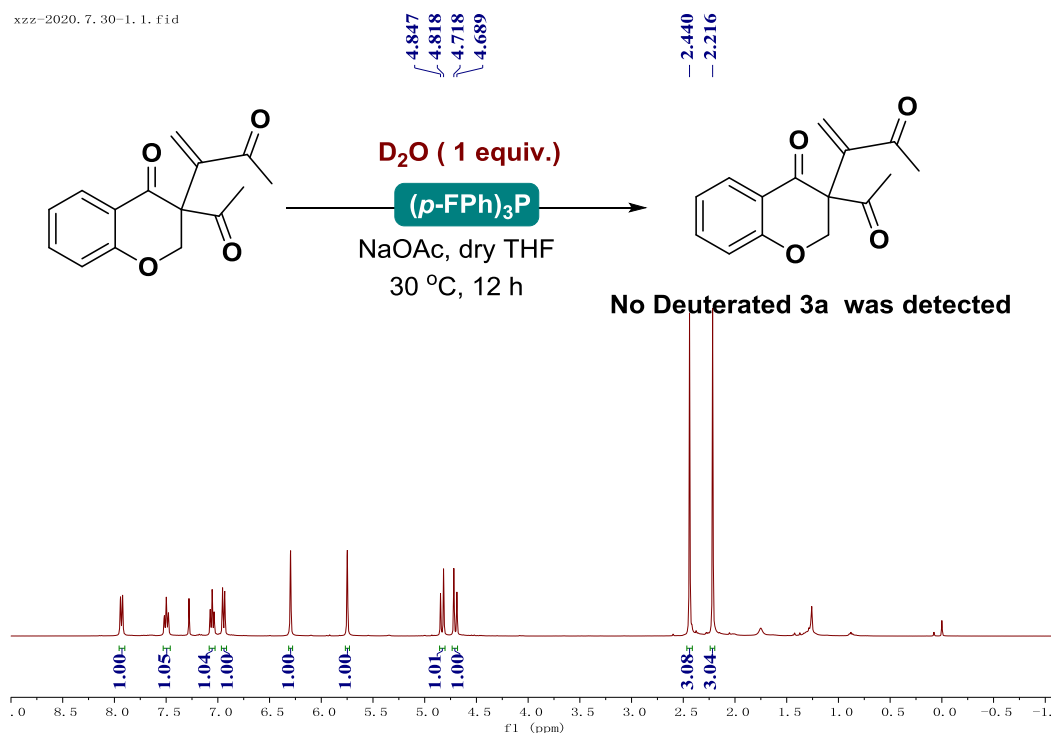

### Verification of intermediate

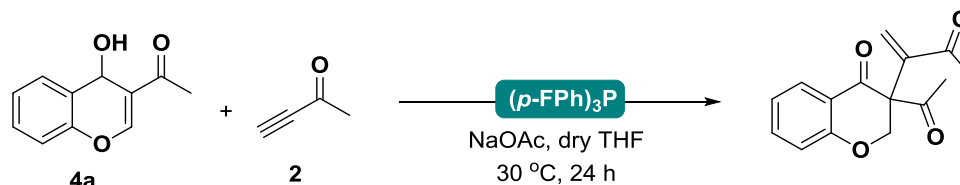

| Entry | Solvent | Catalyst                        | Additive | Time (h) | Yield |
|-------|---------|---------------------------------|----------|----------|-------|
| 1     | Dry THF | ( <i>p</i> -FPh) <sub>3</sub> P | --       | 24       | Nd.   |
| 2     | Dry THF | ( <i>p</i> -FPh) <sub>3</sub> P | NaOAc    | 24       | Nd.   |

<sup>a</sup>Reaction conditions: **4a** (1.0 equiv, 0.05 mmol), **2** (2.0 equiv, 0.1 mmol), catalyst (0.4 equiv, 0.02 mmol), additive (0.5 equiv, 0.025 mmol) and dry THF (0.2 M, 0.25 mL), 24 h, monitored by TLC

## 6. Characterization data of compounds (3)

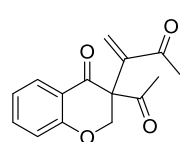

**3a**: yellow solid; yield 46.5 mg (90%) from 24.4 mg of **1a**; m.p. 115-117 °C; **IR** (neat)  $\nu$  3360, 2940, 2074, 1710, 1175, 956, 759 cm<sup>-1</sup>; **<sup>1</sup>H NMR** (CDCl<sub>3</sub>, 400 MHz)  $\delta$  7.94 (dd,  $J = 7.9, 1.5$  Hz, 1H), 7.61-7.43 (m, 1H), 7.06 (t,  $J = 7.1$  Hz, 1H), 6.95 (d,  $J = 8.4$  Hz, 1H), 6.30 (d,  $J = 1.2$  Hz, 1H), 5.75 (d,  $J = 1.3$  Hz, 1H), 4.84 (d,  $J = 11.8$  Hz, 1H), 4.70 (d,  $J = 11.8$  Hz, 1H), 2.45 (s, 3H), 2.22 (s, 3H); **<sup>13</sup>C {<sup>1</sup>H} NMR** (CDCl<sub>3</sub>, 100 MHz)  $\delta$  202.0, 198.7, 190.8, 161.0, 144.6, 136.5, 129.7, 127.6, 121.9, 120.8, 118.0, 71.1, 65.6, 28.7, 26.4; **HRMS** (ESI): C<sub>15</sub>H<sub>14</sub>NaO<sub>4</sub><sup>+</sup>, [M+Na]<sup>+</sup> Calcd 281.0784, Found 281.0781.

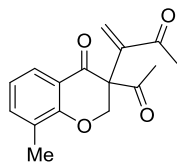

**3b**: yellow solid; yield 36.5 mg (67%) from 27.2 mg of **1b**; m.p. 164-166 °C; **IR** (neat)  $\nu$  3391, 2928, 1997, 1691, 1186, 953, 762  $\text{cm}^{-1}$ ;  **$^1\text{H}$  NMR** ( $\text{CDCl}_3$ , 400 MHz)  $\delta$  7.78 (d,  $J = 7.6$  Hz, 1H), 7.35 (d,  $J = 7.2$  Hz, 1H), 6.95 (t,  $J = 7.6$  Hz, 1H), 6.30 (s, 1H), 5.75 (s, 1H), 4.84 (d,  $J = 11.6$  Hz, 1H), 4.73 (d,  $J = 11.6$  Hz, 1H), 2.45 (s, 3H), 2.22 (s, 3H), 2.20 (s, 3H);  **$^{13}\text{C}$  { $^1\text{H}$ } NMR** ( $\text{CDCl}_3$ , 100 MHz)  $\delta$  202.3, 198.8, 191.2, 159.3, 144.7, 137.4, 129.6, 127.3, 125.2, 121.3, 120.5, 71.0, 65.4, 28.8, 26.4, 15.5; **HRMS** (ESI):  $\text{C}_{16}\text{H}_{16}\text{NaO}_4^+$ ,  $[\text{M}+\text{Na}]^+$  Calcd 295.0941, Found 295.0981.

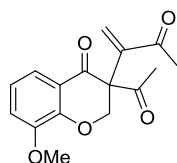

**3c**: yellow solid; yield 37.5 mg (65%) from 30.4 mg of **1c**; m.p. 140-142 °C; **IR** (neat)  $\nu$  3388, 2933, 1948, 1690, 1185, 946, 748  $\text{cm}^{-1}$ ;  **$^1\text{H}$  NMR** ( $\text{CDCl}_3$ , 400 MHz)  $\delta$  7.53 (d,  $J = 7.6$  Hz, 1H), 7.07 (d,  $J = 7.2$  Hz, 1H), 7.00 (t,  $J = 8.0$  Hz, 1H), 6.31 (s, 1H), 5.76 (s, 1H), 4.90 (d,  $J = 12.0$  Hz, 1H), 4.80 (d,  $J = 12.0$  Hz, 1H), 3.89 (s, 3H), 2.43 (s, 3H), 2.22 (s, 3H);  **$^{13}\text{C}$  { $^1\text{H}$ } NMR** ( $\text{CDCl}_3$ , 100 MHz)  $\delta$  201.9, 198.6, 190.8, 151.0, 148.7, 144.5, 121.5, 121.4, 118.6, 117.1, 71.7, 65.3, 56.2, 28.8, 26.3; **HRMS** (ESI):  $\text{C}_{16}\text{H}_{16}\text{NaO}_5^+$ ,  $[\text{M}+\text{Na}]^+$  Calcd 311.0890, Found 311.0910.

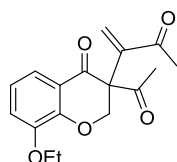

**3d**: yellow solid; yield 31.4 mg (52%) from 33.2 mg of **1d**; m.p. 151-153 °C; **IR** (neat)  $\nu$  3343, 2989, 1937, 1770, 1032, 879, 757  $\text{cm}^{-1}$ ;  **$^1\text{H}$  NMR** ( $\text{CDCl}_3$ , 400 MHz)  $\delta$  7.45 (d,  $J = 8.0$  Hz, 1H), 7.00 (d,  $J = 7.6$  Hz, 1H), 6.90 (t,  $J = 8.0$  Hz, 1H), 6.23 (s, 1H), 5.68 (s, 1H), 4.82 (d,  $J = 12.0$  Hz, 1H), 4.72 (d,  $J = 12.0$  Hz, 1H), 4.05-4.00 (m, 2H), 2.36 (s, 3H), 2.14 (s, 3H), 1.39 (t,  $J = 7.2$  Hz, 3H);  **$^{13}\text{C}$  { $^1\text{H}$ } NMR** ( $\text{CDCl}_3$ , 100 MHz)  $\delta$  201.0, 197.5, 189.9, 150.4, 147.1, 143.5, 128.8, 120.7, 120.3, 117.6, 117.5, 70.6, 64.2, 63.9, 27.8, 25.3, 13.7; **HRMS** (ESI):  $\text{C}_{17}\text{H}_{18}\text{NaO}_5^+$ ,  $[\text{M}+\text{Na}]^+$  Calcd 325.1046, Found 325.1024.

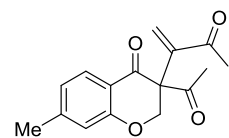

**3e**: yellow solid; yield 30.5 mg (56%) from 27.2 mg of **1e**; m.p. 176-178 °C; **IR** (neat)  $\nu$  3365, 2941, 1808, 1571, 1131, 898, 656  $\text{cm}^{-1}$ ;  **$^1\text{H}$  NMR** ( $\text{CDCl}_3$ , 400 MHz)  $\delta$  7.82 (d,  $J = 8.0$  Hz, 1H), 6.87 (d,  $J = 8.4$  Hz, 1H), 6.74 (s, 1H), 6.28 (d,  $J = 1.2$  Hz, 1H), 5.75 (d,  $J = 1.2$  Hz, 1H), 4.81 (d,  $J = 11.6$  Hz, 1H), 4.67 (d,  $J = 12.0$  Hz, 1H), 2.43 (s, 3H), 2.36 (s, 3H), 2.21 (s, 3H);  **$^{13}\text{C}$  { $^1\text{H}$ } NMR** ( $\text{CDCl}_3$ , 100 MHz)  $\delta$  202.2, 198.7, 190.4, 161.1, 148.3, 144.8, 129.5, 127.5, 123.3, 118.6, 117.9, 71.1, 65.6, 28.7, 26.4, 22.0; **HRMS** (ESI):  $\text{C}_{16}\text{H}_{16}\text{NaO}_4^+$ ,  $[\text{M}+\text{Na}]^+$  Calcd 295.0941, Found 295.0912.

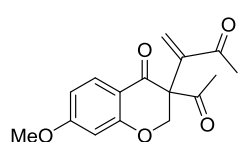

**3f**: yellow solid; yield 36.9 mg (64%) from 30.4 mg of **1f**; m.p. 139-141 °C; **IR** (neat)  $\nu$  3396, 2930, 2131, 1686, 1165, 1035, 822  $\text{cm}^{-1}$ ;  **$^1\text{H}$  NMR** ( $d_6$ -DMSO, 400 MHz)  $\delta$  7.74 (d,  $J = 8.8$  Hz, 1H), 6.71 (d,  $J = 8.8$  Hz, 1H), 6.56 (s, 1H), 6.50 (s, 1H), 5.77 (s, 1H), 4.83 (d,  $J = 11.6$  Hz, 1H), 4.65 (d,  $J = 11.6$  Hz, 1H), 3.83 (s, 3H), 2.42 (s, 3H), 2.11 (s, 3H);  **$^{13}\text{C}$  { $^1\text{H}$ } NMR** ( $d_6$ -DMSO, 100 MHz)  $\delta$  202.6, 199.9, 189.2, 166.4, 163.0, 144.2, 130.4, 129.2, 114.7, 111.1, 101.1, 71.4, 65.1, 56.4, 28.4, 26.9; **HRMS** (ESI):  $\text{C}_{16}\text{H}_{16}\text{NaO}_5^+$ ,  $[\text{M}+\text{Na}]^+$  Calcd 311.0890, Found 311.0867.

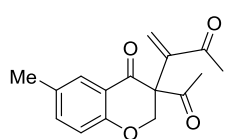

**3g**: yellow solid; yield 32.7 mg (60%) from 27.2 mg of **1g**; m.p. 157-159 °C; **IR** (neat)  $\nu$  3364, 2919, 2071, 1694, 1167, 959, 838  $\text{cm}^{-1}$ ;  **$^1\text{H}$  NMR** ( $\text{CDCl}_3$ , 400 MHz)  $\delta$  7.71 (s, 1H), 7.31 (d,  $J = 8.4$  Hz, 1H), 6.84 (d,  $J = 8.4$  Hz, 1H), 6.28 (s, 1H), 5.75 (s, 1H), 4.80 (d,  $J = 11.8$  Hz, 1H), 4.67 (d,  $J = 11.8$  Hz, 1H), 2.43 (s, 3H), 2.32 (s, 3H), 2.21 (s, 3H);  **$^{13}\text{C}$  { $^1\text{H}$ } NMR** ( $\text{CDCl}_3$ , 100 MHz)  $\delta$  202.1, 198.7, 190.9, 159.1, 144.8, 137.6, 131.4, 129.4, 127.1, 120.4, 117.7, 71.2, 65.7, 28.7, 26.4, 20.4; **HRMS** (ESI):  $\text{C}_{16}\text{H}_{16}\text{NaO}_4^+$ ,  $[\text{M}+\text{Na}]^+$  Calcd 295.0941, Found 295.0922.

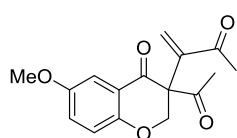

**3h**: yellow solid; yield 35.8 mg (62%) from 30.4 mg of **1h**; m.p. 173-175 °C; **IR** (neat)  $\nu$  3378, 2938, 2007, 1693, 1172, 824, 727  $\text{cm}^{-1}$ ;  **$^1\text{H}$  NMR** ( $\text{CDCl}_3$ , 400 MHz)  $\delta$  7.34 (d,  $J = 2.8$  Hz, 1H), 7.11 (dd,  $J = 9.0, 2.8$  Hz, 1H), 6.88 (d,  $J = 9.0, 1.2$  Hz, 1H), 6.29 (s,  $J = 1.5$  Hz, 1H), 5.75 ( $J = 1.6$  Hz, 1H), 4.79 (d,  $J = 11.8$  Hz, 1H), 4.66 (d,  $J = 11.8$  Hz, 1H), 3.81 (s, 3H), 2.44 (s, 3H), 2.22 (s, 3H);  **$^{13}\text{C}$  { $^1\text{H}$ } NMR** ( $\text{CDCl}_3$ , 100 MHz)  $\delta$  202.0, 198.6, 190.8, 155.8, 154.4, 144.9, 129.4, 125.8, 120.6, 119.2, 107.7, 71.4, 65.7, 55.8, 28.7, 26.4; **HRMS** (ESI):  $\text{C}_{16}\text{H}_{16}\text{NaO}_5^+$ ,  $[\text{M}+\text{Na}]^+$  Calcd 311.0890, Found 311.0871.

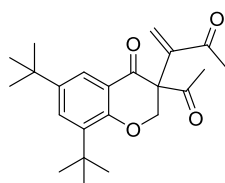

**3i**: yellow solid; yield 37.0 mg (50%) from 46.9 mg of **1i**; m.p. 181-183 °C; **IR** (neat)  $\nu$  3345, 2976, 1745, 1508, 1054, 987, 723  $\text{cm}^{-1}$ ;  **$^1\text{H}$  NMR** ( $d_6$ -DMSO, 400 MHz)  $\delta$  7.66 (d,  $J = 2.3$  Hz, 1H), 7.53 (d,  $J = 2.3$  Hz, 1H), 6.46 (d,  $J = 1.2$  Hz, 1H), 5.77 (d,  $J = 1.2$  Hz, 1H), 4.87 (d,  $J = 11.8$  Hz, 1H), 4.71 (d,  $J = 11.8$  Hz, 1H), 2.40 (s, 3H), 2.12 (s, 3H), 1.33 (s, 9H), 1.28 (s, 9H);  **$^{13}\text{C}$  { $^1\text{H}$ } NMR** ( $d_6$ -DMSO, 100 MHz)  $\delta$  202.6, 200.0, 191.3, 158.1, 144.2, 143.6, 138.2, 130.8, 129.7, 121.1, 120.9, 70.8, 65.3, 35.1, 34.6,

31.5, 29.8, 28.2, 26.9; **HRMS** (ESI):  $C_{23}H_{30}NaO_4^+$ ,  $[M+Na]^+$  Calcd 393.2036, Found 393.2012.

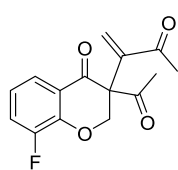

**3j**: yellow solid; yield 42.0 mg (76%) from 28.0 mg of **1j**; m.p. 170-172 °C; **IR** (neat)  $\nu$  3387, 2923, 2015, 1701, 1180, 1031, 772  $cm^{-1}$ ;  **$^1H$  NMR** ( $CDCl_3$ , 400 MHz)  $\delta$  7.64 (d,  $J = 8.0$  Hz, 1H), 7.23-7.20 (m, 1H), 6.94-6.89 (m, 1H), 6.25 (d,  $J = 7.2$  Hz, 1H), 5.68 (d,  $J = 0.8$  Hz, 1H), 4.83 (d,  $J = 12.0$  Hz, 1H), 4.73 (d,  $J = 12.0$  Hz, 1H), 2.37 (s, 3H), 2.14 (s, 3H);  **$^{13}C$  { $^1H$ } NMR** ( $CDCl_3$ , 100 MHz)  $\delta$  200.4, 197.4, 188.9 (d,  $J_{C-F} = 3.3$  Hz), 150.4 (d,  $J_{C-F} = 249.6$  Hz), 148.4 (d,  $J_{C-F} = 11.9$  Hz), 143.3, 128.8, 121.9, 121.6 (d,  $J_{C-F} = 3.9$  Hz), 121.3 (d,  $J_{C-F} = 17.4$  Hz), 120.3 (d,  $J_{C-F} = 6.4$  Hz), 70.7, 64.7, 27.6, 25.3; **HRMS** (ESI):  $C_{15}H_{13}FNaO_4^+$ ,  $[M+Na]^+$  Calcd 299.0690, Found 299.0674.

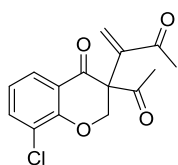

**3k**: yellow solid; yield 42.7 mg (73%) from 31.3 mg of **1k**; m.p. 160-162 °C; **IR** (neat)  $\nu$  3405, 2937, 2292, 1719, 1190, 1048, 742  $cm^{-1}$ ;  **$^1H$  NMR** ( $CDCl_3$ , 400 MHz)  $\delta$  7.87 (d,  $J = 8.0$  Hz, 1H), 7.59 (d,  $J = 8.0$  Hz, 1H), 7.02 (t,  $J = 8.0$  Hz, 1H), 6.34 (s, 1H), 5.75 (s, 1H), 4.93 (d,  $J = 12.0$  Hz, 1H), 4.82 (d,  $J = 12.0$  Hz, 1H), 2.45 (s, 3H), 2.22 (s, 3H);  **$^{13}C$  { $^1H$ } NMR** ( $CDCl_3$ , 100 MHz)  $\delta$  201.4, 198.5, 190.1, 156.6, 144.2, 136.5, 129.9, 126.2, 122.8, 122.1, 122.0, 71.6, 65.3, 28.6, 26.4; **HRMS** (ESI):  $C_{15}H_{13}ClNaO_4^+$ ,  $[M+Na]^+$  Calcd 315.0395, Found 315.0415.

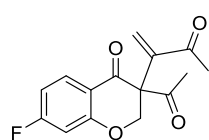

**3l**: yellow solid; yield 40.3 mg (73%) from 28.0 mg of **1l**; m.p. 155-157 °C; **IR** (neat)  $\nu$  3391, 2924, 2056, 1681, 1132, 952, 805  $cm^{-1}$ ;  **$^1H$  NMR** ( $CDCl_3$ , 400 MHz)  $\delta$  7.96 (dd,  $J = 8.8, 6.5$  Hz, 1H), 6.81-6.76 (m, 1H), 6.64 (dd,  $J = 9.7, 2.4$  Hz, 1H), 6.32 (d,  $J = 1.5$  Hz, 1H), 5.76 (d,  $J = 1.5$  Hz, 1H), 4.85 (d,  $J = 11.9$  Hz, 1H), 4.72 (d,  $J = 11.9$  Hz, 1H), 2.45 (s, 3H), 2.21 (s, 3H);  **$^{13}C$  { $^1H$ } NMR** ( $CDCl_3$ , 100 MHz)  $\delta$  201.7, 198.6, 189.4, 167.7 (d,  $J_{C-F} = 257.6$  Hz), 162.8 (d,  $J_{C-F} = 13.8$  Hz), 144.4, 130.2 (d,  $J_{C-F} = 11.5$  Hz), 129.8, 117.7 (d,  $J_{C-F} = 2.4$  Hz), 110.5 (d,  $J_{C-F} = 22.9$  Hz), 104.8 (d,  $J_{C-F} = 24.6$  Hz), 71.5, 65.5, 28.6, 26.4; **HRMS** (ESI):  $C_{15}H_{13}FNaO_4^+$ ,  $[M+Na]^+$  Calcd 299.0690, Found 299.0712.

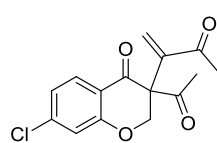

**3m**: yellow solid; yield 42.2 mg (72%) from 31.3 mg of **1m**; m.p. 133-135 °C; **IR** (neat)  $\nu$  3389, 2926, 2062, 1674, 1183, 1050, 804  $cm^{-1}$ ;  **$^1H$  NMR** ( $CDCl_3$ , 400 MHz)  $\delta$  7.80 (d,  $J = 8.5$  Hz, 1H), 6.96

(dd,  $J = 8.5, 1.8$  Hz, 1H), 6.90 (d,  $J = 1.8$  Hz, 1H), 6.23 (d,  $J = 1.2$  Hz, 1H), 5.66 (d,  $J = 1.2$  Hz, 1H), 4.76 (d,  $J = 11.9$  Hz, 1H), 4.63 (d,  $J = 11.9$  Hz, 1H), 2.36 (s, 3H), 2.13 (s, 3H);  $^{13}\text{C}$  { $^1\text{H}$ } NMR (CDCl<sub>3</sub>, 100 MHz)  $\delta$  200.5, 197.5, 188.7, 160.3, 143.5, 141.5, 128.6, 127.8, 121.7, 118.4, 117.1, 70.4, 64.7, 27.5, 25.4; HRMS (ESI): C<sub>15</sub>H<sub>13</sub>ClNaO<sub>4</sub><sup>+</sup>, [M+Na]<sup>+</sup> Calcd 315.0395, Found 315.0377.

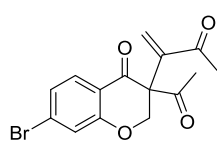

**3n**: yellow solid; yield 43.8 mg (65%) from 40.2 mg of **1n**; m.p. 185-187 °C; IR (neat)  $\nu$  3393, 2930, 2056, 1665, 1178, 1041, 864 cm<sup>-1</sup>;  $^1\text{H}$  NMR (CDCl<sub>3</sub>, 400 MHz)  $\delta$  7.73 (d,  $J = 8.4$  Hz, 1H), 7.13 (dd,  $J = 8.4, 1.8$  Hz, 1H), 7.09 (d,  $J = 1.8$  Hz, 1H), 6.24 (d,  $J = 1.5$  Hz, 1H), 5.67 (d,  $J = 1.5$  Hz, 1H), 4.76 (d,  $J = 11.9$  Hz, 1H), 4.63 (d,  $J = 11.9$  Hz, 1H), 2.37 (s, 3H), 2.14 (s, 3H);  $^{13}\text{C}$  { $^1\text{H}$ } NMR (CDCl<sub>3</sub>, 100 MHz)  $\delta$  200.5, 197.5, 188.9, 160.2, 143.4, 130.1, 128.8, 127.8, 124.6, 120.2, 118.7, 70.3, 64.6, 27.6, 25.4; HRMS (ESI): C<sub>15</sub>H<sub>13</sub>BrNaO<sub>4</sub><sup>+</sup>, [M+Na]<sup>+</sup> Calcd 358.9889, Found 358.9864.

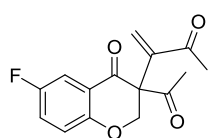

**3o**: yellow solid; yield 39.2 mg (71%) from 28.0 mg of **1o**; m.p. 144-146 °C; IR (neat)  $\nu$  3386, 2928, 1701, 1445, 1154, 814, 733 cm<sup>-1</sup>;  $^1\text{H}$  NMR (CDCl<sub>3</sub>, 400 MHz)  $\delta$  7.50 (dd,  $J = 8.2, 3.1$  Hz, 1H), 7.18-7.13 (m, 1H), 6.86 (dd,  $J = 9.1, 4.2$  Hz, 1H), 6.24 (d,  $J = 1.2$  Hz, 1H), 5.67 (d,  $J = 1.2$  Hz, 1H), 4.74 (d,  $J = 11.9$  Hz, 1H), 4.61 (d,  $J = 11.9$  Hz, 1H), 2.37 (s, 3H), 2.14 (s, 3H);  $^{13}\text{C}$  { $^1\text{H}$ } NMR (CDCl<sub>3</sub>, 100 MHz)  $\delta$  200.5, 197.4, 189.0 (d,  $J_{\text{C-F}} = 1.8$  Hz), 156.4 (d,  $J_{\text{C-F}} = 242.8$  Hz), 156.3 (d,  $J_{\text{C-F}} = 1.5$  Hz), 143.6, 128.5, 123.1 (d,  $J_{\text{C-F}} = 24.7$  Hz), 120.2 (d,  $J_{\text{C-F}} = 6.6$  Hz), 118.7 (d,  $J = 7.4$  Hz), 111.5 (d,  $J_{\text{C-F}} = 23.6$  Hz), 70.4, 64.6, 27.5, 25.3; HRMS (ESI): C<sub>15</sub>H<sub>13</sub>FN<sub>4</sub>O<sub>4</sub><sup>+</sup>, [M+Na]<sup>+</sup> Calcd 299.0690, Found 299.0673.

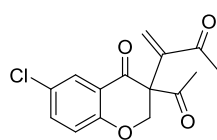

**3p**: yellow solid; yield 48.6 mg (83%) from 31.3 mg of **1p**; m.p. 167-169 °C; IR (neat)  $\nu$  3390, 2931, 1696, 1517, 1250, 802, 651 cm<sup>-1</sup>;  $^1\text{H}$  NMR (CDCl<sub>3</sub>, 400 MHz)  $\delta$  7.81 (d,  $J = 2.6$  Hz, 1H), 7.36 (dd,  $J = 8.9, 2.6$  Hz, 1H), 6.84 (d,  $J = 8.9$  Hz, 1H), 6.23 (d,  $J = 1.4$  Hz, 1H), 5.67 (d,  $J = 1.4$  Hz, 1H), 4.74 (d,  $J = 11.9$  Hz, 1H), 4.63 (d,  $J = 11.9$  Hz, 1H), 2.36 (s, 3H), 2.13 (s, 3H);  $^{13}\text{C}$  { $^1\text{H}$ } NMR (CDCl<sub>3</sub>, 100 MHz)  $\delta$  200.4, 197.4, 188.7, 158.5, 143.5, 135.3, 128.6, 126.4, 125.8, 120.6, 118.7, 70.3, 64.6, 27.5, 25.3; HRMS (ESI): C<sub>15</sub>H<sub>13</sub>ClNaO<sub>4</sub><sup>+</sup>, [M+Na]<sup>+</sup> Calcd 315.0395, Found 315.0383.

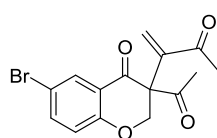

**3q**: yellow solid; yield 41.1 mg (61%) from 40.2 mg of **1q**; m.p. 191-193 °C; **IR** (neat)  $\nu$  3389, 2939, 1697, 1446, 1228, 802, 641  $\text{cm}^{-1}$ ;  **$^1\text{H}$  NMR** ( $\text{CDCl}_3$ , 400 MHz)  $\delta$  8.04 (d,  $J = 2.4$  Hz, 1H), 7.57 (dd,  $J = 8.8, 2.4$  Hz, 1H), 6.86 (d,  $J = 8.8$  Hz, 1H), 6.32 (d,  $J = 1.3$  Hz, 1H), 5.75 (d,  $J = 1.3$  Hz, 1H), 4.82 (d,  $J = 11.9$  Hz, 1H), 4.70 (d,  $J = 11.9$  Hz, 1H), 2.44 (s, 3H), 2.21 (s, 3H);  **$^{13}\text{C}$  { $^1\text{H}$ } NMR** ( $\text{CDCl}_3$ , 100 MHz)  $\delta$  201.4, 198.4, 189.6, 159.9, 144.4, 139.1, 130.0, 129.8, 122.0, 120.0, 114.6, 71.2, 65.6, 28.6, 26.4; **HRMS** (ESI):  $\text{C}_{15}\text{H}_{13}\text{BrNaO}_4^+$ ,  $[\text{M}+\text{Na}]^+$  Calcd 358.9889, Found 358.9865.

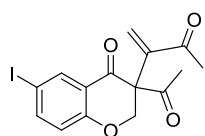

**3r**: yellow solid; yield 43.8 mg (57%) from 49.6 mg of **1r**; m.p. 177-179 °C; **IR** (neat)  $\nu$  3339, 2930, 1683, 1391, 1196, 814, 550  $\text{cm}^{-1}$ ;  **$^1\text{H}$  NMR** ( $\text{CDCl}_3$ , 400 MHz)  $\delta$  8.22 (d,  $J = 2.2$  Hz, 1H), 7.74 (dd,  $J = 8.8, 2.4$  Hz, 1H), 6.74 (d,  $J = 8.8$  Hz, 1H), 6.33 (d,  $J = 1.3$  Hz, 1H), 5.75 (d,  $J = 1.4$  Hz, 1H), 4.81 (d,  $J = 11.9$  Hz, 1H), 4.69 (d,  $J = 11.9$  Hz, 1H), 2.44 (s, 3H), 2.21 (s, 3H);  **$^{13}\text{C}$  { $^1\text{H}$ } NMR** ( $\text{CDCl}_3$ , 100 MHz)  $\delta$  201.5, 198.5, 189.4, 160.6, 144.7, 144.3, 136.1, 129.9, 122.6, 120.3, 84.2, 71.1, 65.5, 28.6, 26.4; **HRMS** (ESI):  $\text{C}_{15}\text{H}_{13}\text{INaO}_4^+$ ,  $[\text{M}+\text{Na}]^+$  Calcd 406.9751, Found 406.9794.

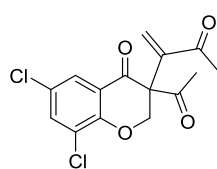

**3s**: yellow solid; yield 41.9 mg (64%) from 38.2 mg of **1s**; m.p. 183-185 °C; **IR** (neat)  $\nu$  3347, 2926, 1679, 1366, 1042, 848, 636  $\text{cm}^{-1}$ ;  **$^1\text{H}$  NMR** ( $\text{CDCl}_3$ , 400 MHz)  $\delta$  7.82 (d,  $J = 1.6$  Hz, 1H), 7.56 (d,  $J = 1.6$  Hz, 1H), 6.34 (s, 1H), 5.75 (s, 1H), 4.91 (d,  $J = 11.9$  Hz, 1H), 4.80 (d,  $J = 11.9$  Hz, 1H), 2.44 (s, 3H), 2.21 (s, 3H);  **$^{13}\text{C}$  { $^1\text{H}$ } NMR** ( $\text{CDCl}_3$ , 100 MHz)  $\delta$  200.8, 198.2, 189.1, 155.3, 144.1, 136.0, 129.9, 127.2, 125.6, 124.0, 122.4, 71.8, 65.5, 28.4, 26.3; **HRMS** (ESI):  $\text{C}_{15}\text{H}_{12}\text{Cl}_2\text{NaO}_4^+$ ,  $[\text{M}+\text{Na}]^+$  Calcd 349.0005, Found 348.9983.

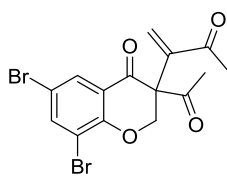

**3t**: yellow solid; yield 50 mg (60%) from 56 mg of **1t**; m.p. 167-169 °C; **IR** (neat)  $\nu$  2920, 1706, 1356, 1188, 938  $\text{cm}^{-1}$ ;  **$^1\text{H}$  NMR** ( $\text{CDCl}_3$ , 400 MHz)  $\delta$  8.01 (d,  $J = 2.4$  Hz, 1H), 7.86 (d,  $J = 2.4$  Hz, 1H), 6.34 (s, 1H), 5.75 (s, 1H), 4.91 (d,  $J = 12.0$  Hz, 1H), 4.80 (d,  $J = 12.0$  Hz, 1H), 2.44 (s, 3H), 2.21 (s, 3H);  **$^{13}\text{C}$  { $^1\text{H}$ } NMR** ( $\text{CDCl}_3$ , 100 MHz)  $\delta$  200.8, 198.2, 189.0, 156.6, 144.1, 141.5, 130.0, 129.4, 122.7, 114.4, 112.8, 71.8, 65.3, 28.4, 26.3; **HRMS** (ESI):  $\text{C}_{15}\text{H}_{12}\text{Br}_2\text{NaO}_4^+$ ,  $[\text{M}+\text{Na}]^+$  Calcd 436.8995, Found 436.9012.

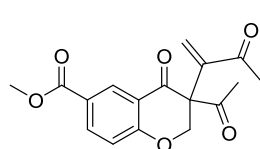

**3u**: yellow oil; yield 31 mg (49%) from 36.0 mg of **1u**; **IR** (neat)  $\nu$  2936, 1706, 1230, 972, 761  $\text{cm}^{-1}$ ;  **$^1\text{H}$  NMR** ( $\text{CDCl}_3$ , 400 MHz)  $\delta$  8.63 (d,  $J = 1.6$  Hz, 1H), 8.15 (dd,  $J = 8.8, 2.0$  Hz, 1H), 7.00 (d,  $J = 8.8$  Hz, 1H), 6.32 (s, 1H), 5.75 (s, 1H), 4.89 (d,  $J = 12.0$  Hz, 1H), 4.77 (d,  $J = 12.0$  Hz, 1H), 3.92 (s, 3H), 2.45 (s, 3H), 2.22 (s, 3H);  **$^{13}\text{C}$  { $^1\text{H}$ } NMR** ( $\text{CDCl}_3$ , 100 MHz)  $\delta$  201.4, 198.4, 189.8, 165.8, 164.0, 144.3, 137.1, 130.1, 129.8, 124.2, 120.3, 118.3, 71.2, 65.7, 52.2, 28.5, 26.4; **HRMS** (ESI):  $\text{C}_{17}\text{H}_{16}\text{NaO}_6^+$ ,  $[\text{M}+\text{Na}]^+$  Calcd 339.0839, Found 339.0853.

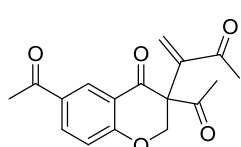

**3v**: yellow oil; yield 34 mg (57%) from 33 mg of **1v**; **IR** (neat)  $\nu$  3362, 2918, 1678, 1220, 975  $\text{cm}^{-1}$ ;  **$^1\text{H}$  NMR** ( $\text{CDCl}_3$ , 400 MHz)  $\delta$  8.44 (s, 1H), 8.07 (d,  $J = 8.4$  Hz, 1H), 6.95 (d,  $J = 8.7$  Hz, 1H), 6.26 (s, 1H), 5.69 (s, 1H), 4.83 (d,  $J = 11.9$  Hz, 1H), 4.70 (d,  $J = 12.0$  Hz, 1H), 2.53 (s, 3H), 2.38 (s, 3H), 2.15 (s, 3H);  **$^{13}\text{C}$  { $^1\text{H}$ } NMR** ( $\text{CDCl}_3$ , 100 MHz)  $\delta$  201.2, 198.4, 196.0, 190.0, 164.2, 144.3, 135.7, 131.3, 129.8, 129.0, 120.0, 118.7, 71.3, 65.8, 29.7, 28.4, 26.4; **HRMS** (ESI):  $\text{C}_{17}\text{H}_{16}\text{NaO}_5^+$ ,  $[\text{M}+\text{Na}]^+$  Calcd 323.0890, Found 323.0903.

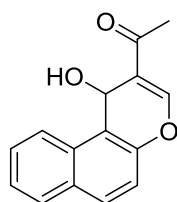

**3w**: yellow solid; 15 mg (31%) from 34 mg of **3w**; m.p. 191-193  $^{\circ}\text{C}$ ; **IR** (neat)  $\nu$  3368, 2924, 1008, 746, 596  $\text{cm}^{-1}$ ;  **$^1\text{H}$  NMR** ( $d_6$ -DMSO, 400 MHz)  $\delta$  8.50-8.47 (m, 2H), 8.01 (d,  $J = 8.9$  Hz, 1H), 7.94 (d,  $J = 8.0$  Hz, 1H), 7.66 (d,  $J = 7.6$  Hz, 1H), 7.49 (t,  $J = 7.5$  Hz, 1H), 7.33-7.28 (m, 2H), 6.36 (d,  $J = 6.4$  Hz, 1H), 2.56 (s, 3H);  **$^{13}\text{C}$  { $^1\text{H}$ } NMR** ( $d_6$ -DMSO, 100 MHz)  $\delta$  196.7, 152.0, 133.3, 130.9, 129.6, 129.43, 129.36, 129.1, 128.1, 124.9, 122.4, 118.8, 113.0, 88.2, 26.2; **HRMS** (ESI):  $\text{C}_{15}\text{H}_{12}\text{NaO}_3^+$ ,  $[\text{M}+\text{Na}]^+$  Calcd 263.0679, Found 263.0681.

## 7. $^1\text{H}$ NMR, $^{13}\text{C}$ NMR of compounds (3)

### Product 3a: $^1\text{H}$ NMR

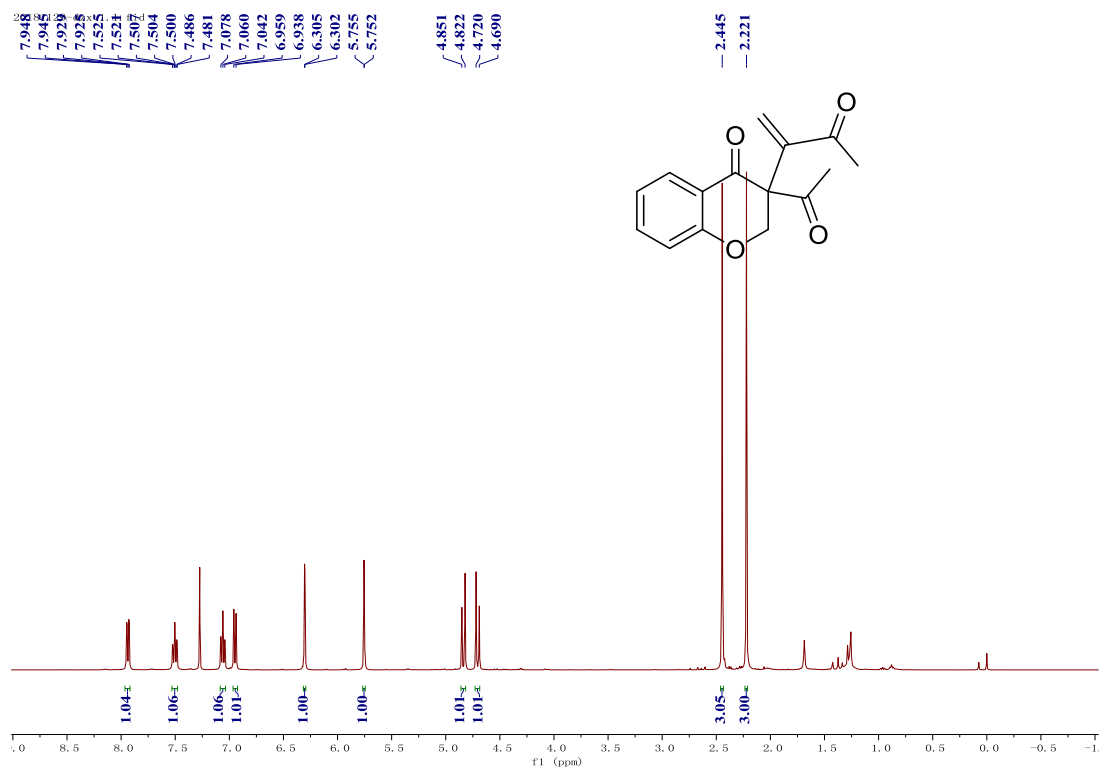

### Product 3a: $^{13}\text{C}$ NMR

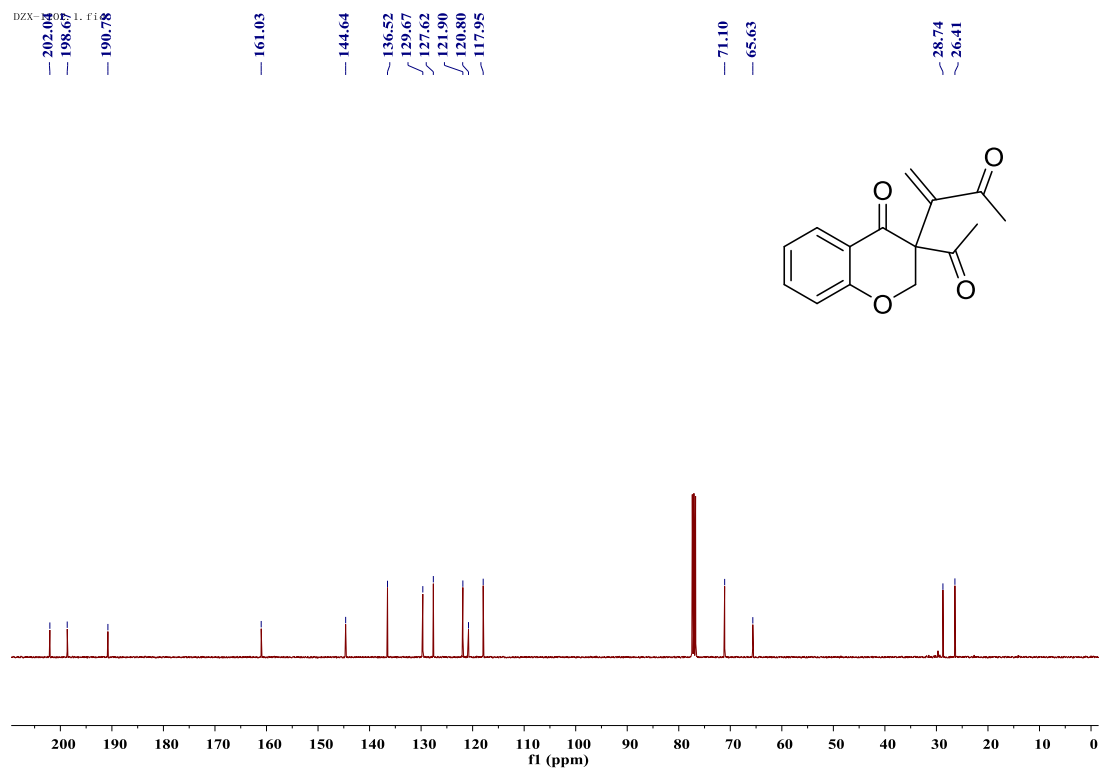



## HSQC NMR:

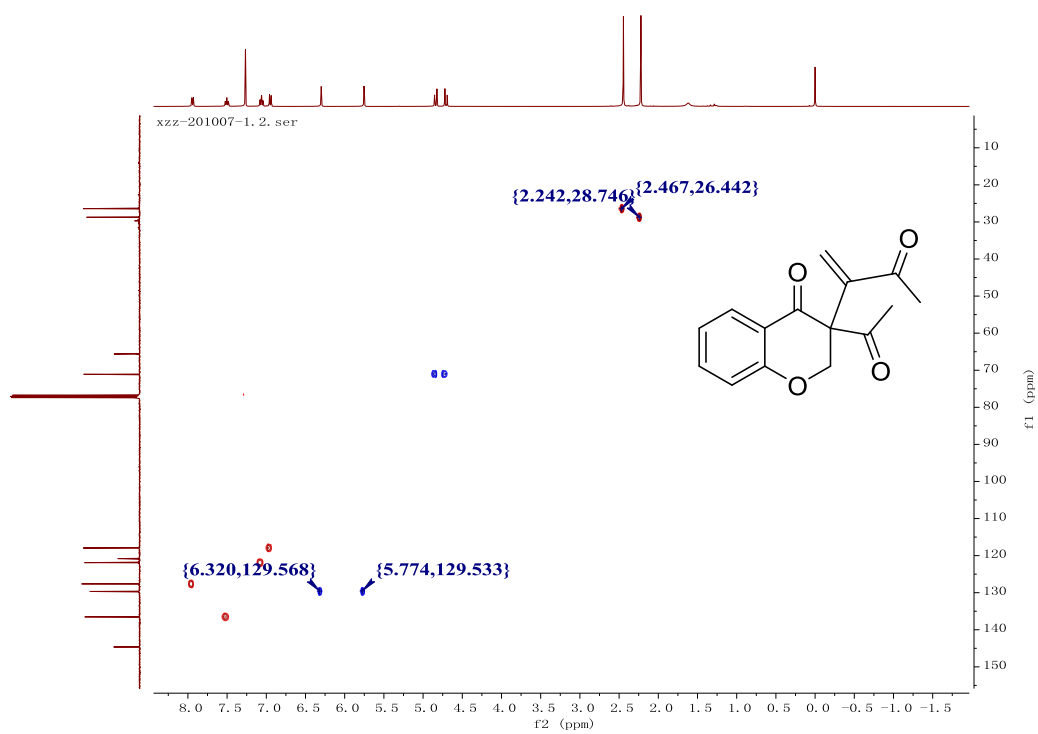

## HMBC NMR:

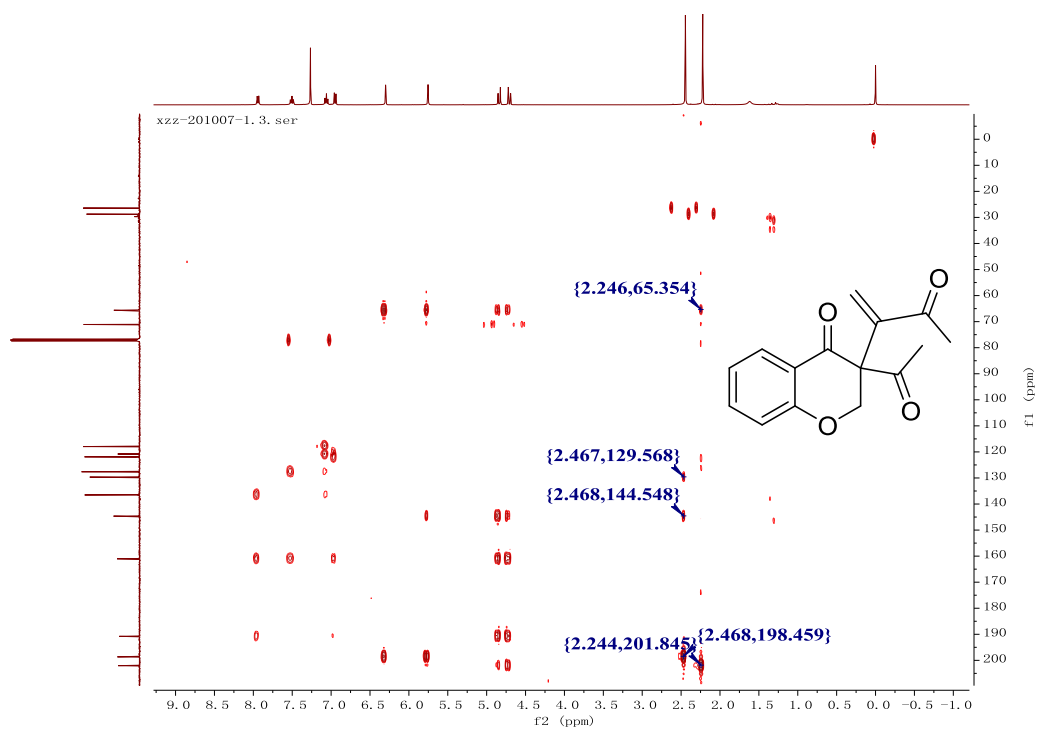

## Product 3b: $^1\text{H}$ NMR

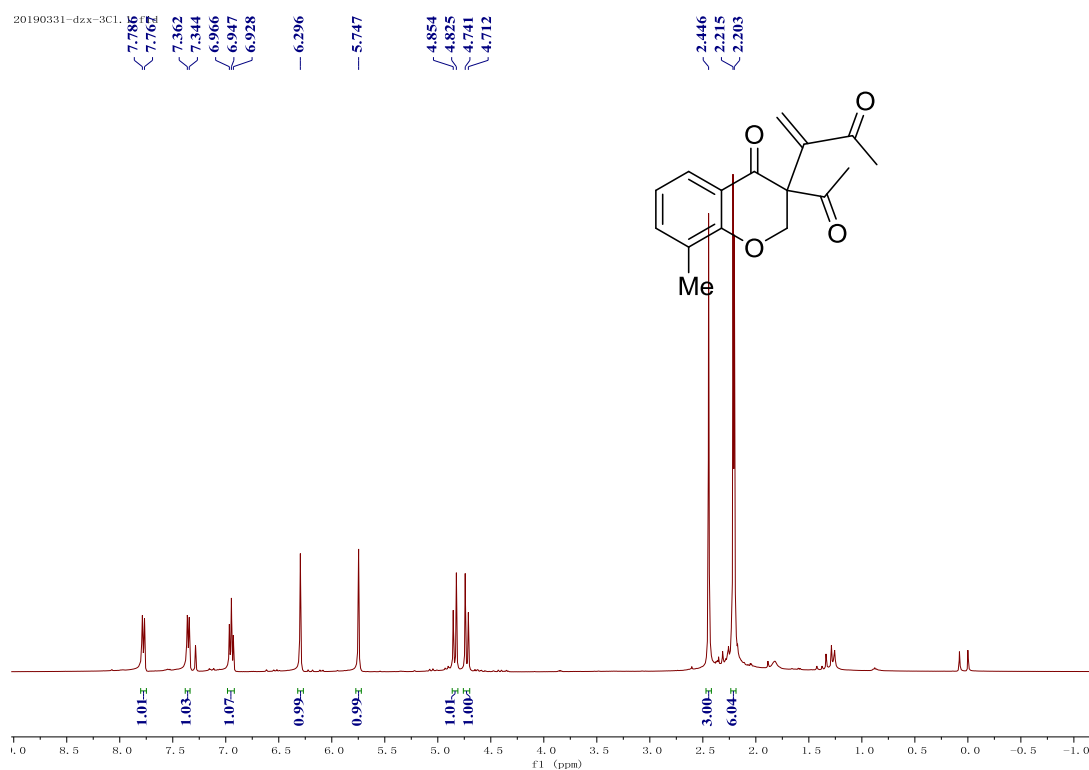

## Product 3b: $^{13}\text{C}$ NMR

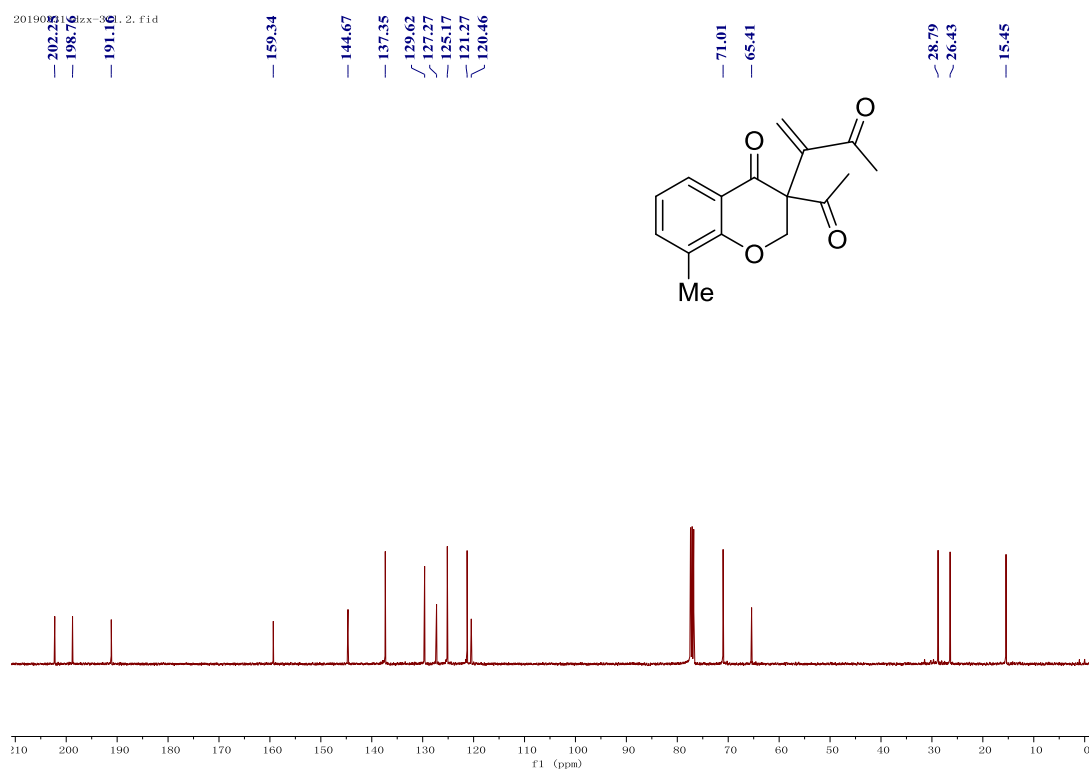

### Product 3c: $^1\text{H}$ NMR

xz-ch-3c.1.fid

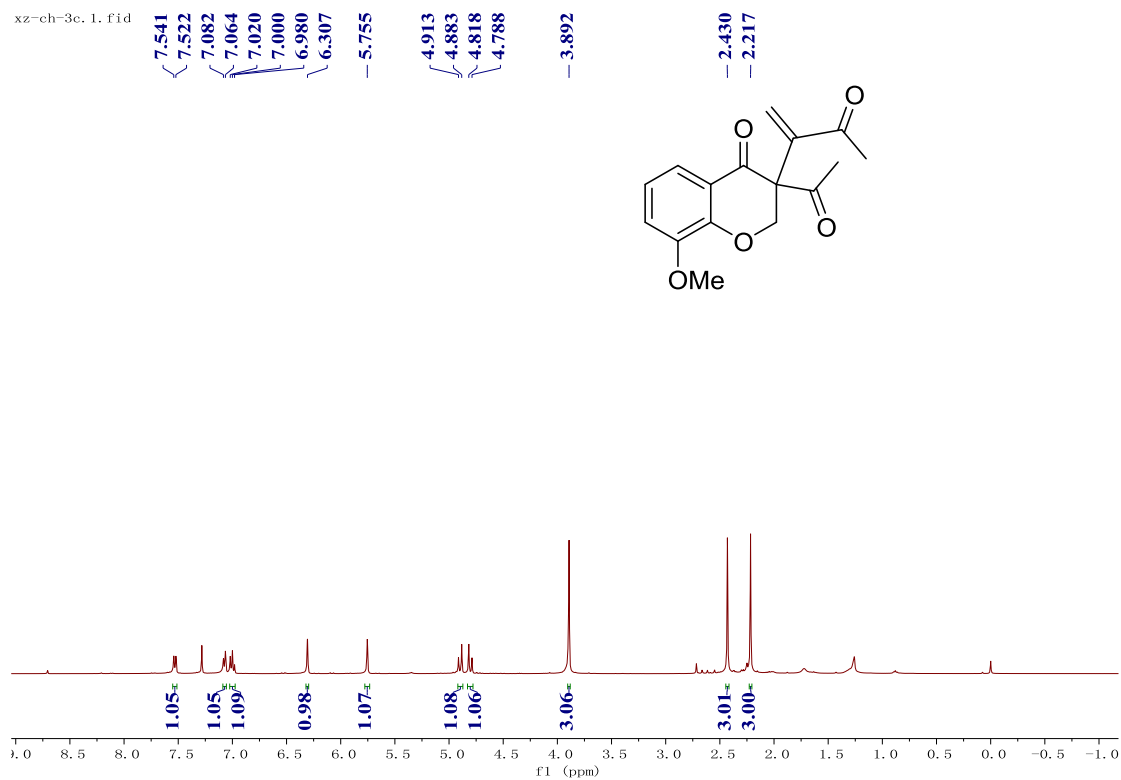

### Product 3c: $^{13}\text{C}$ NMR

xz-ch-

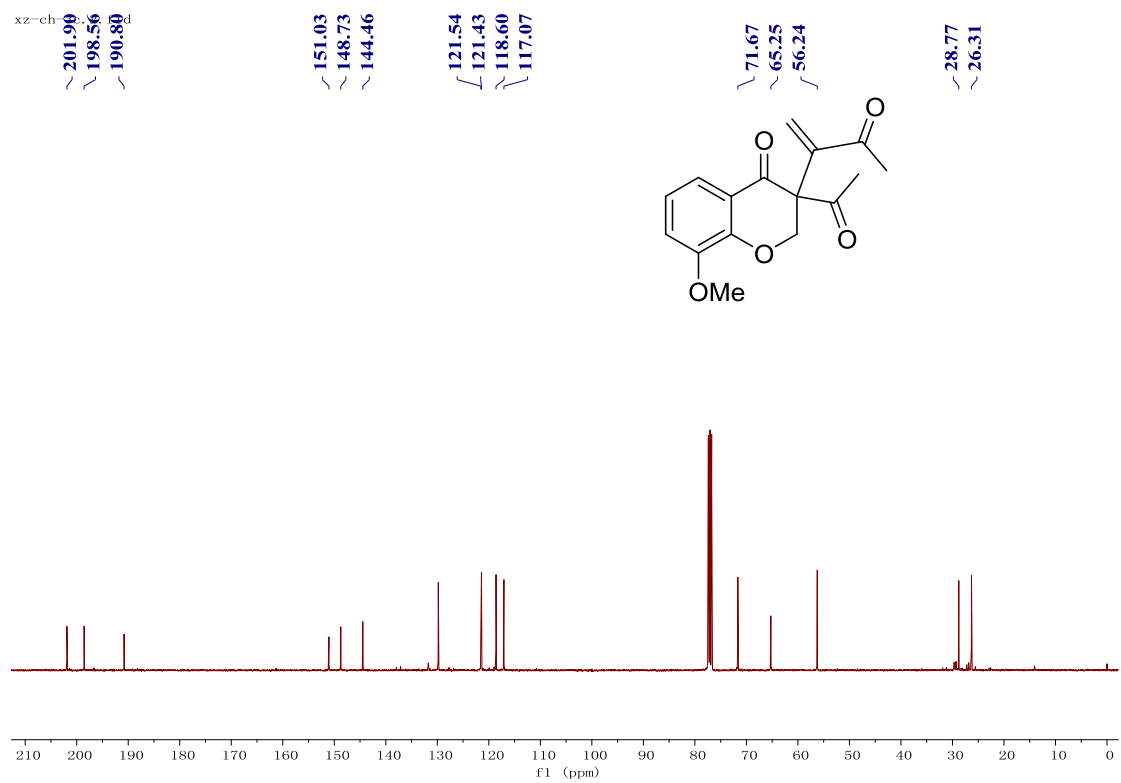

### Product 3d: $^1\text{H}$ NMR

xz-ch-3d.1.fid

7.459  
7.439  
7.001  
6.982  
6.916  
6.896  
6.876  
6.230  
5.681  
4.834  
4.804  
4.738  
4.708  
4.054  
4.048  
4.031  
4.019  
4.014  
4.002  
3.997  
2.358  
2.141  
1.408  
1.390  
1.373

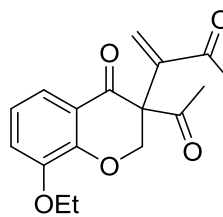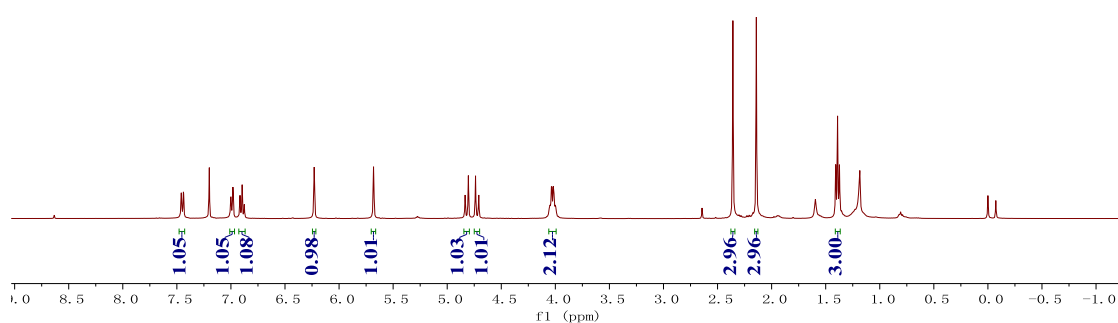

### Product 3d: $^{13}\text{C}$ NMR

xz-ch-3d.1.fid

200.85  
197.51  
189.93  
150.37  
147.09  
143.53  
128.75  
120.66  
120.34  
117.56  
117.47  
70.60  
64.19  
63.85  
27.79  
25.29  
13.66

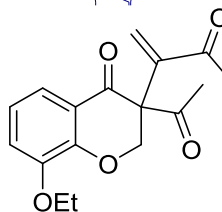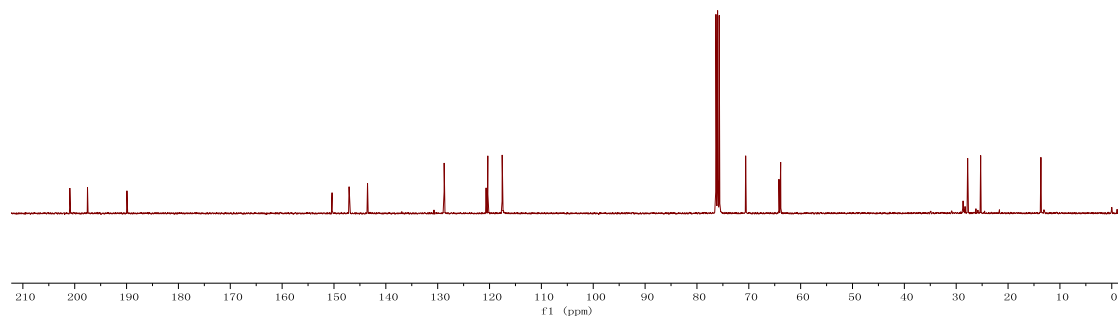

## Product 3e: <sup>1</sup>H NMR

xz-ch-3e.1.F1

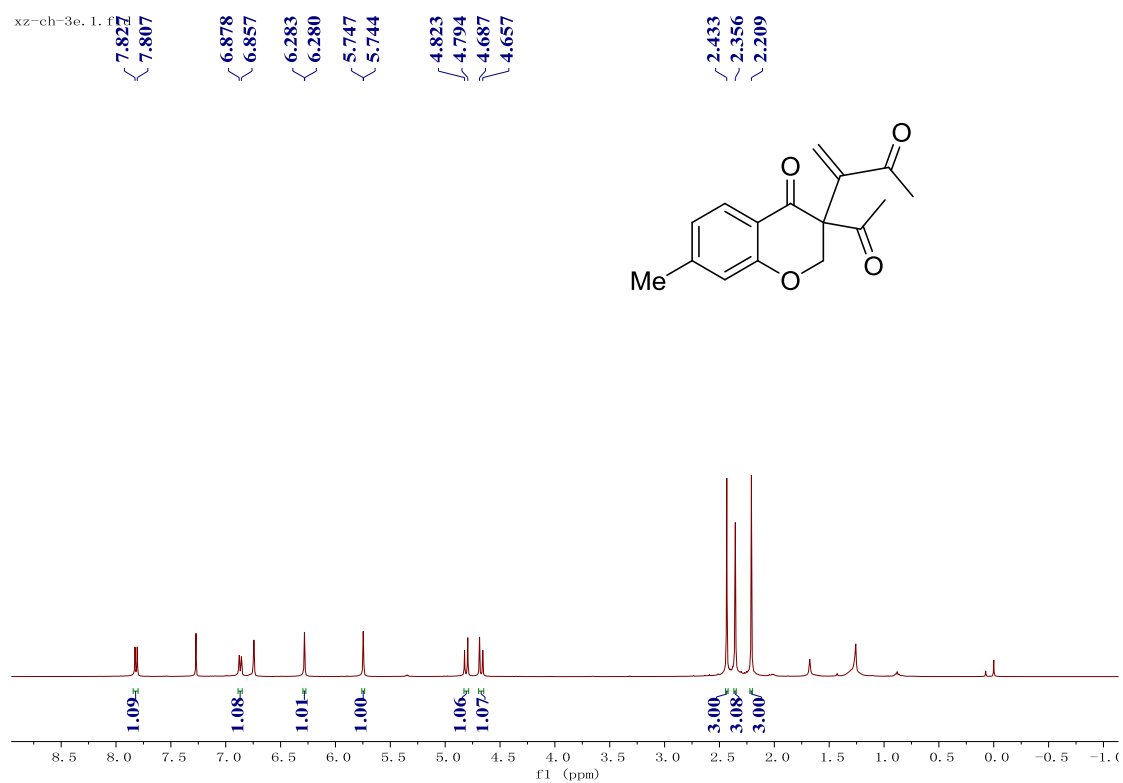

## Product 3e: <sup>13</sup>C NMR

xz-ch-3e.1.F1

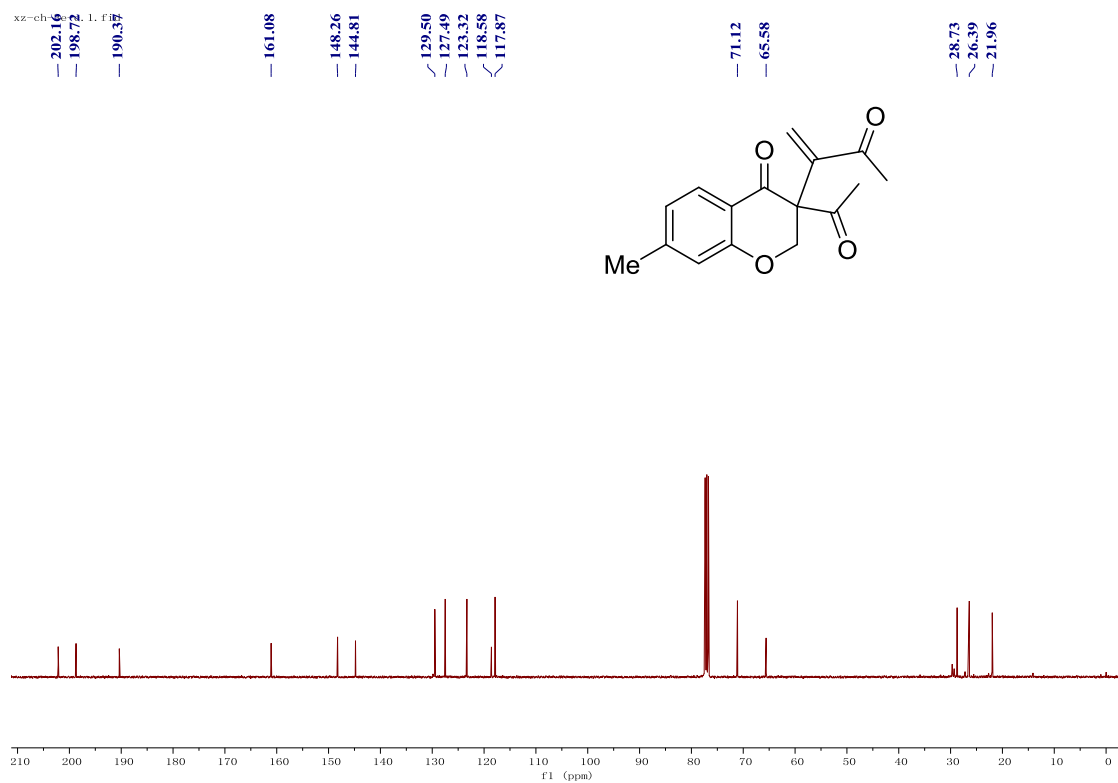

## Product 3f: <sup>1</sup>H NMR

20190511-dzx-lan

7.752  
7.738

6.717  
6.695  
6.558  
6.498

5.766

4.844  
4.815  
4.666  
4.637

3.826

2.415  
2.106

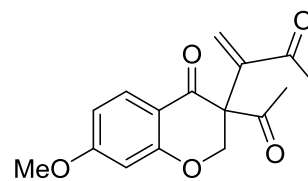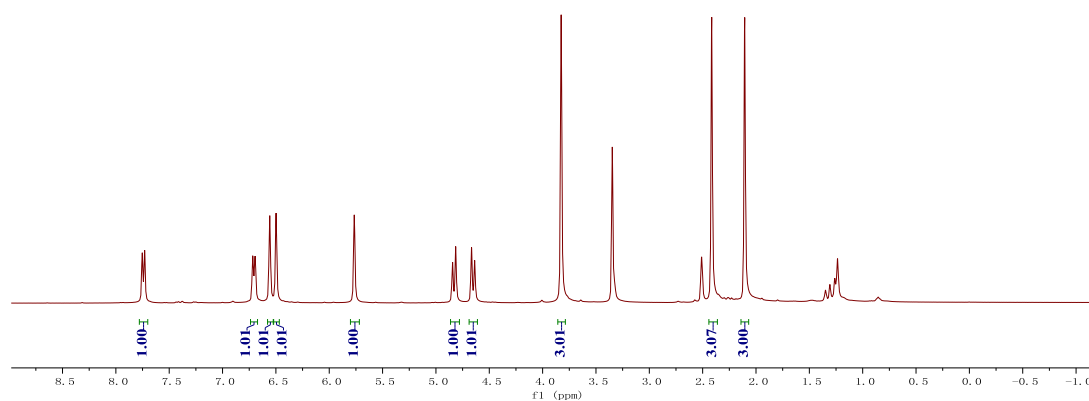

## Product 3f: <sup>13</sup>C NMR

20190511-dzx-lan\_2.fid

202.86  
199.91

189.17

166.41  
162.98

144.15

130.35  
129.20

114.70  
111.11

101.14

71.35  
65.06

56.38

28.40  
26.86

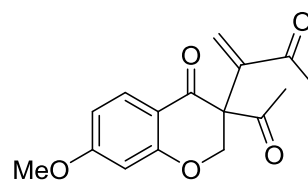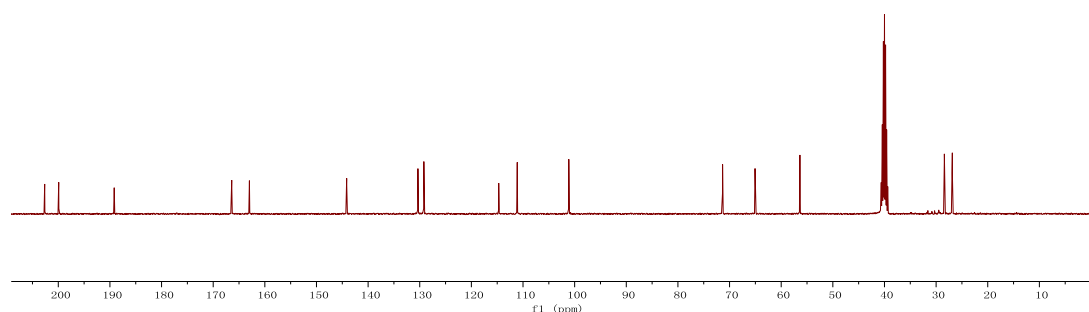

## Product 3g: <sup>1</sup>H NMR

201801115-dzx-5Me.1.f1d

7.713

7.317

7.296

6.851

6.830

6.284

5.745

4.811

4.781

4.682

4.653

2.432

2.317

2.210

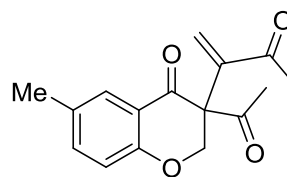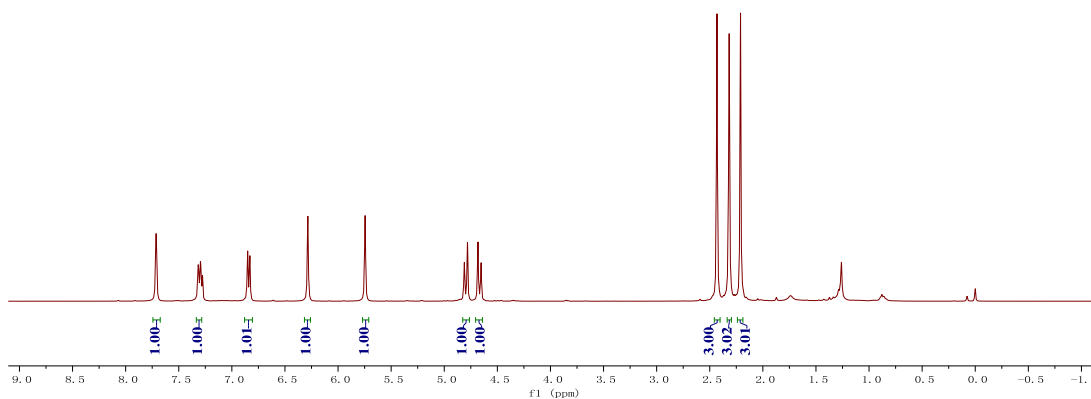

## Product 3g: <sup>13</sup>C NMR

201801115-dzx-5Me-C.1.f1d

202.05

198.65

190.88

159.13

144.84

137.61

131.37

129.44

127.09

120.44

117.70

71.15

65.72

28.70

26.37

20.42

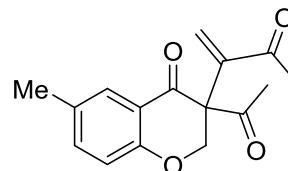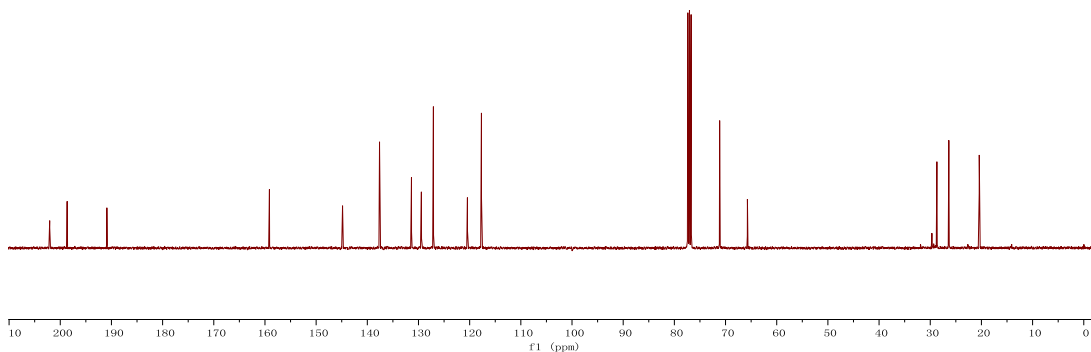

### Product 3h: <sup>1</sup>H NMR

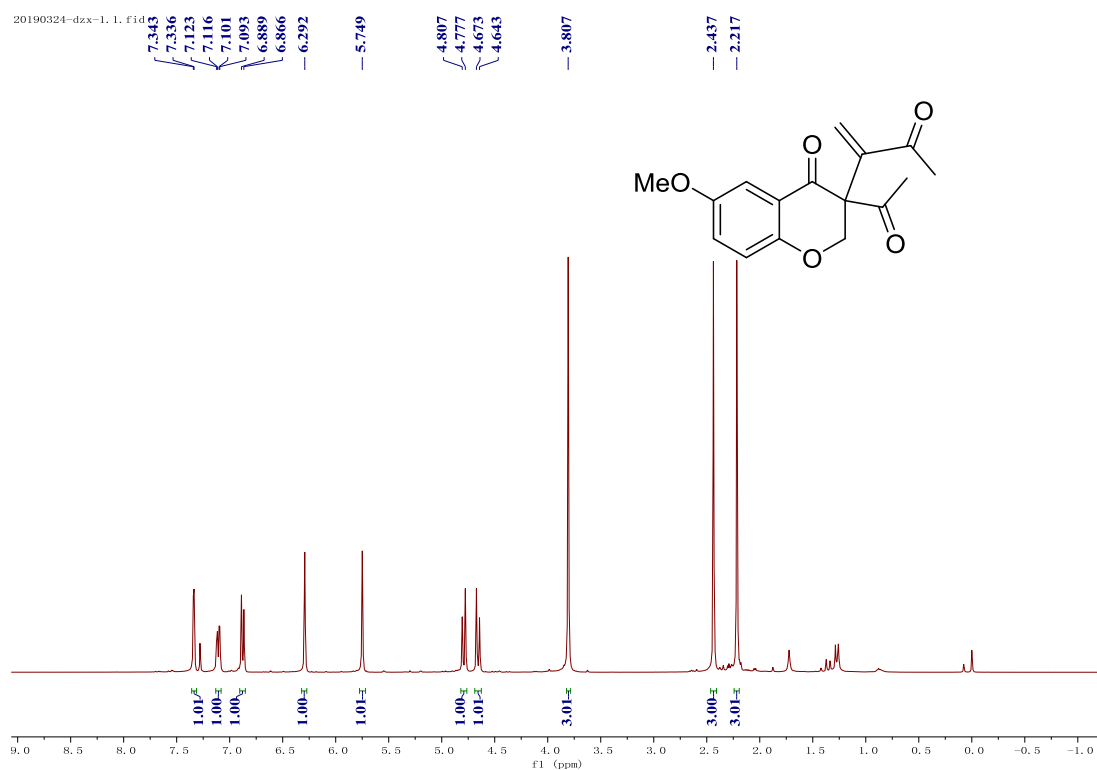

### Product 3h: <sup>13</sup>C NMR

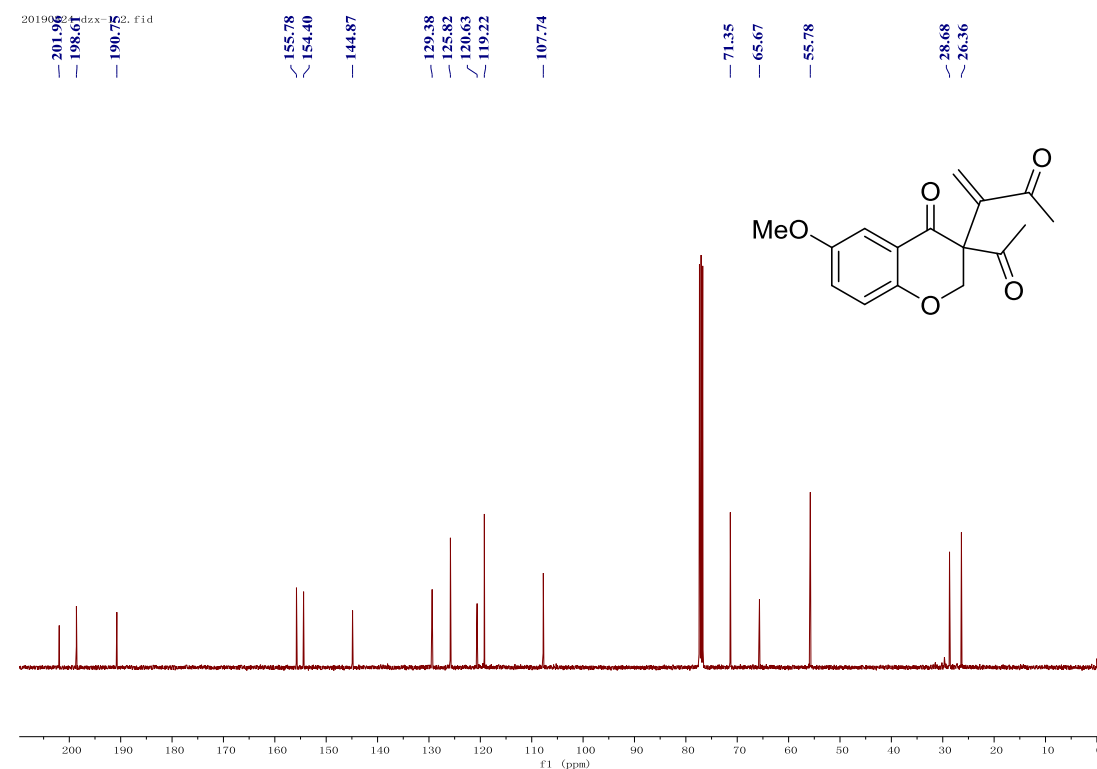



## Product 3i: <sup>1</sup>H NMR

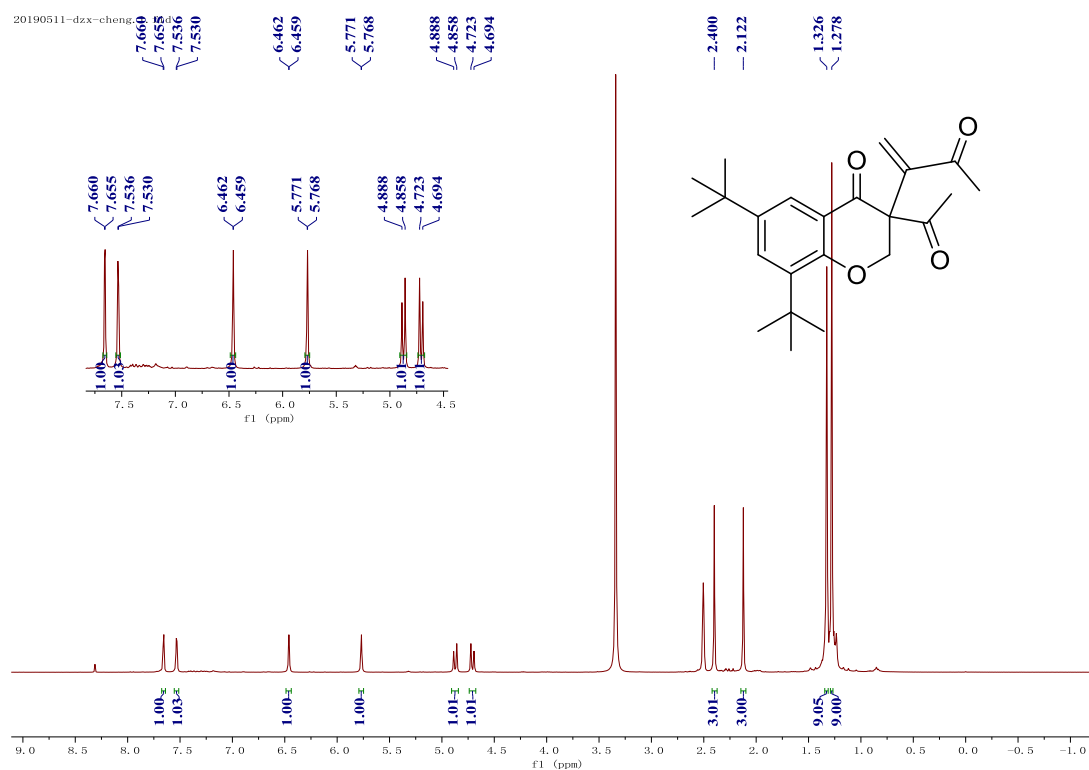

## Product 3i: <sup>13</sup>C NMR

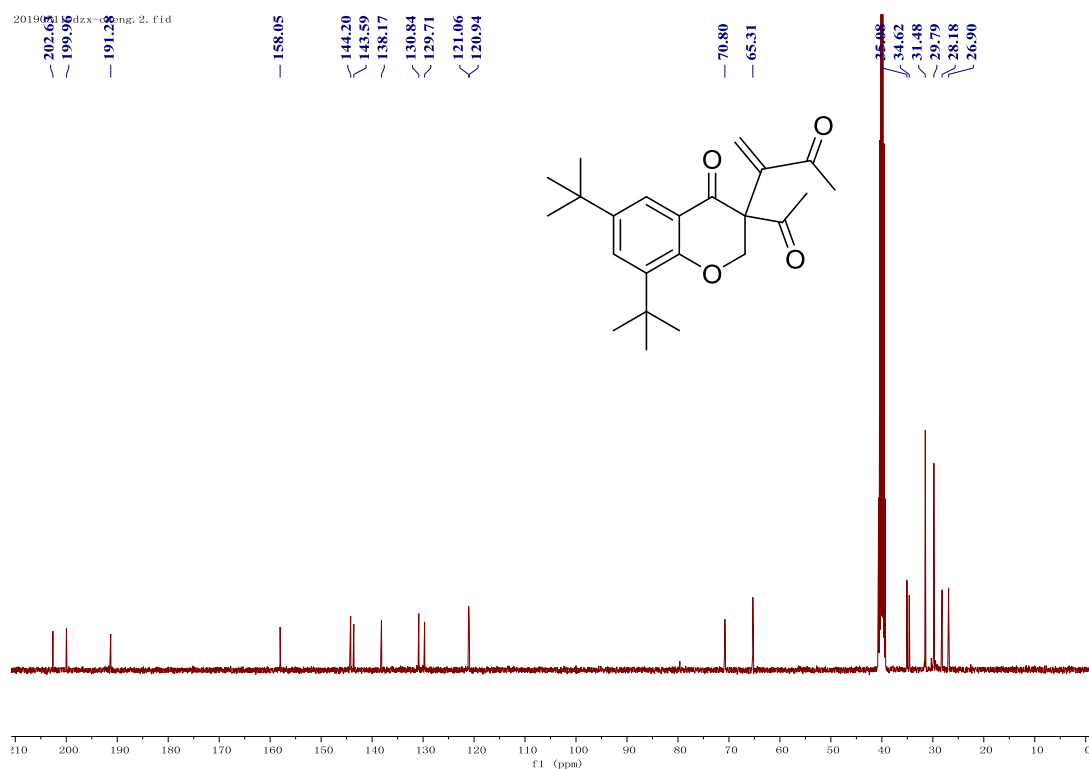

### Product 3j: <sup>1</sup>H NMR

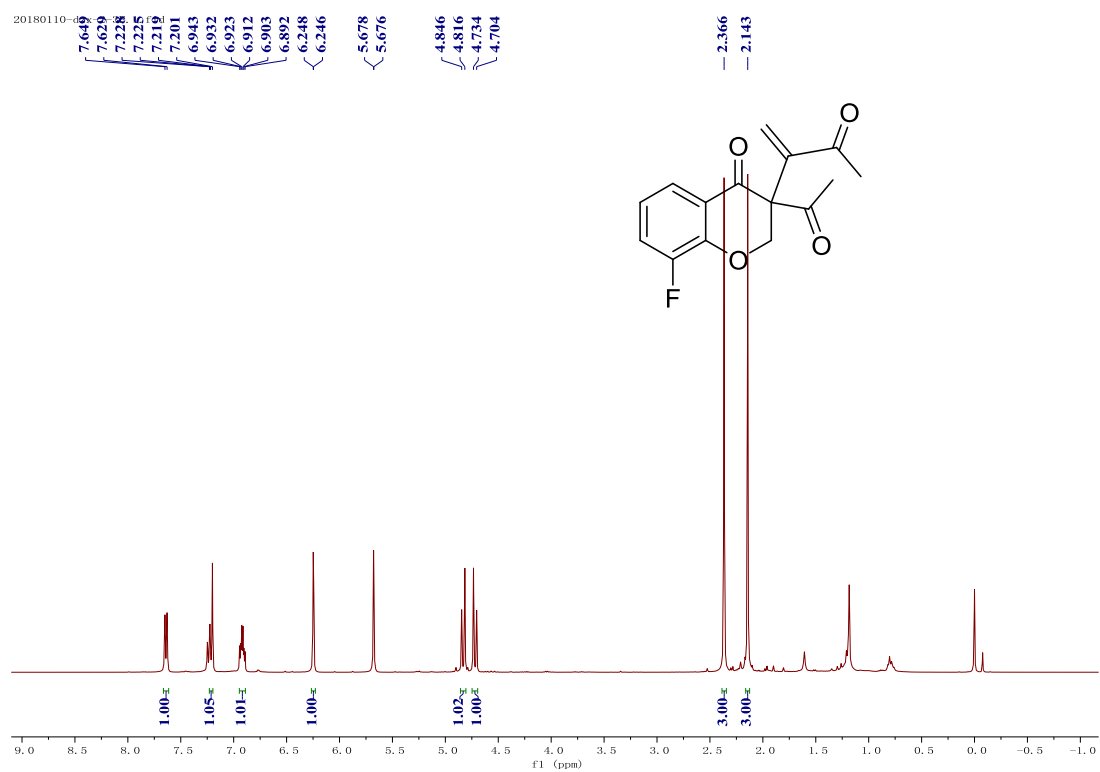

### Product 3j: <sup>13</sup>C NMR

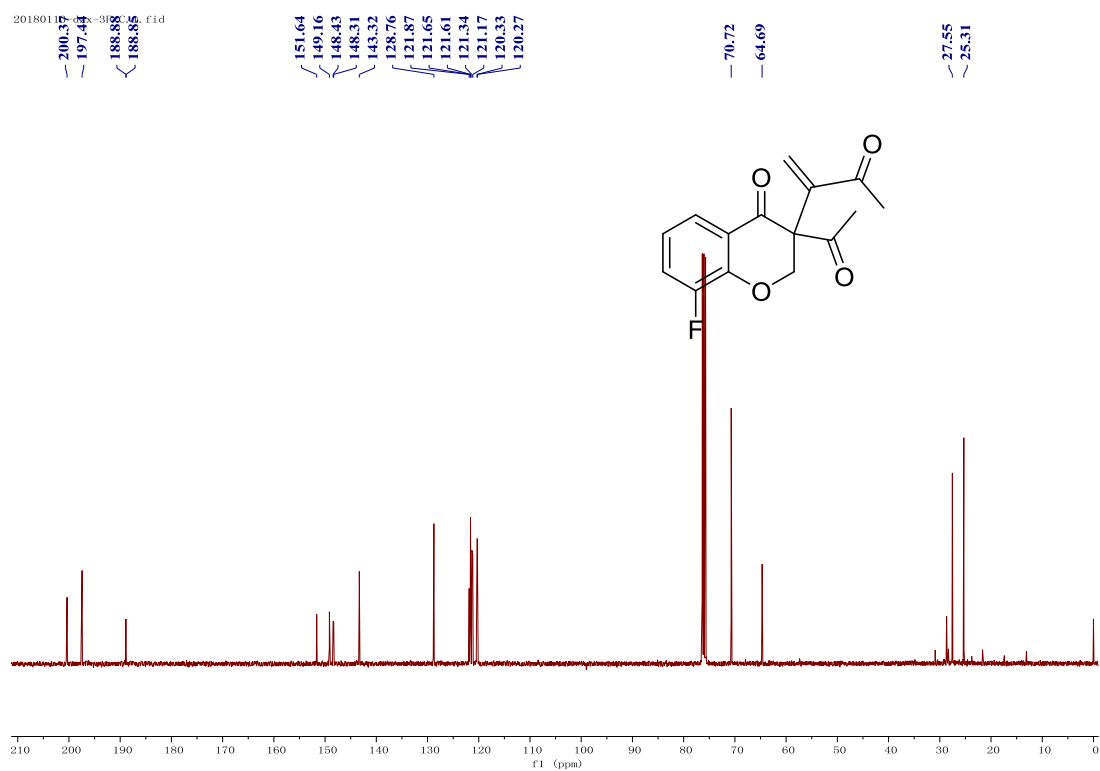

## Product 3k: $^1\text{H}$ NMR

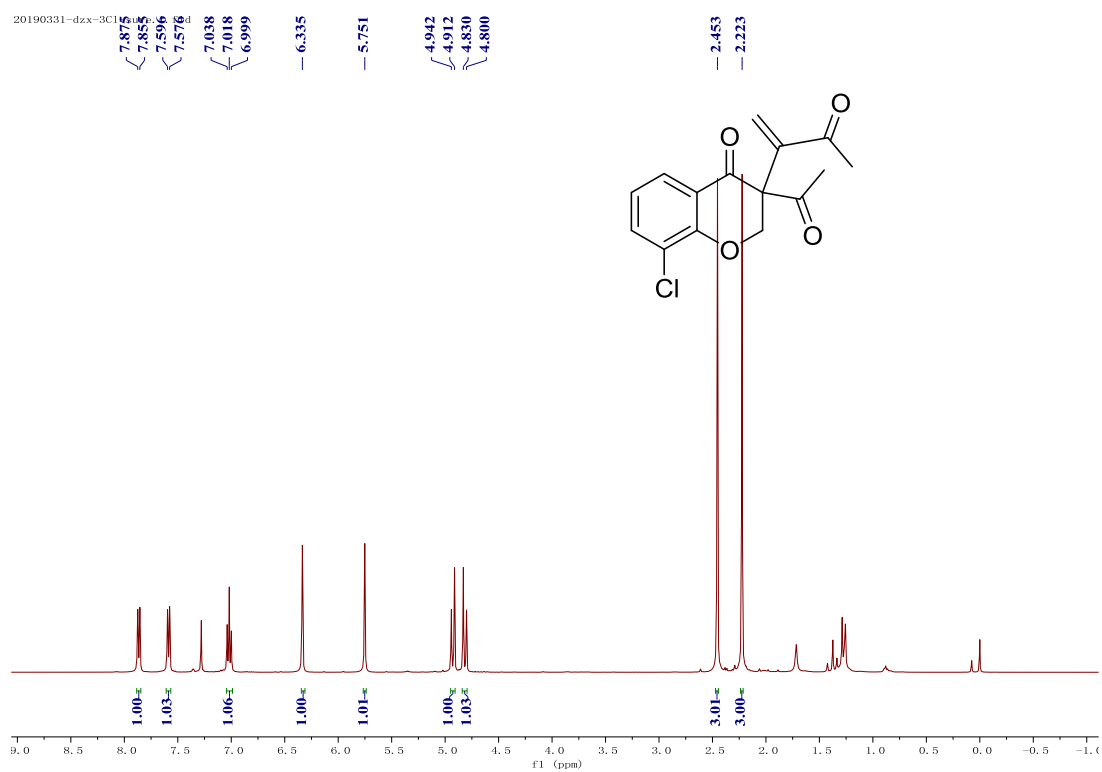

## Product 3k: $^{13}\text{C}$ NMR

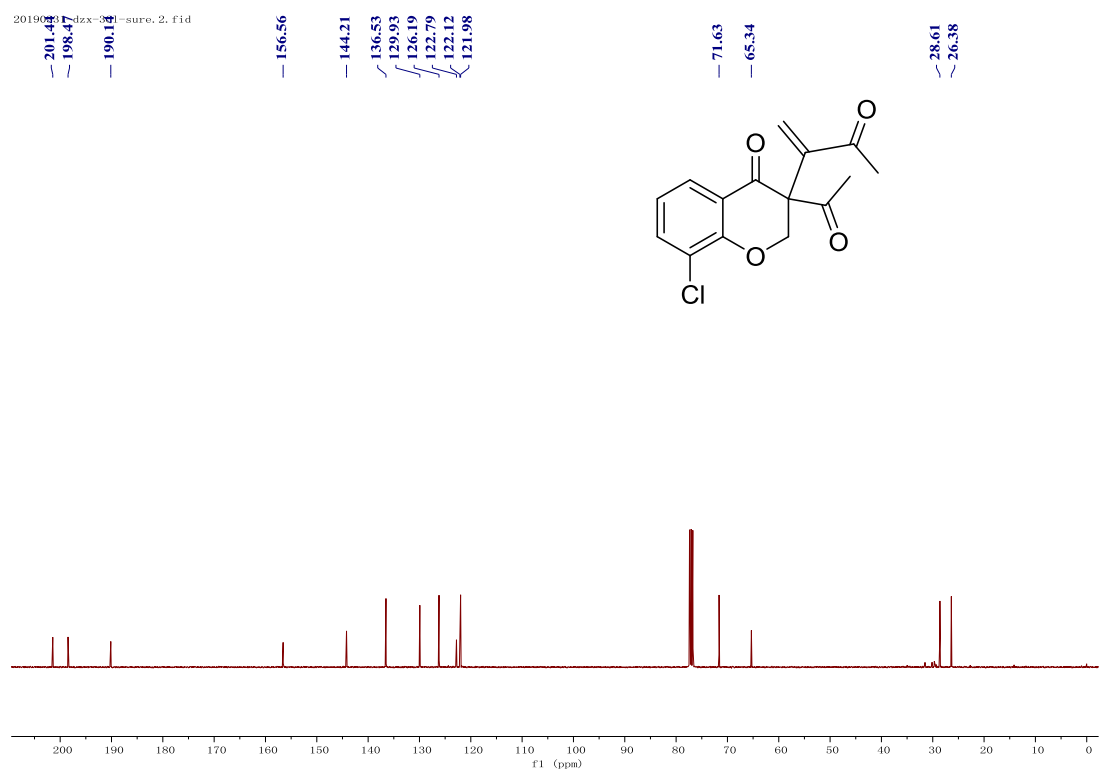

### Product 3l: <sup>1</sup>H NMR

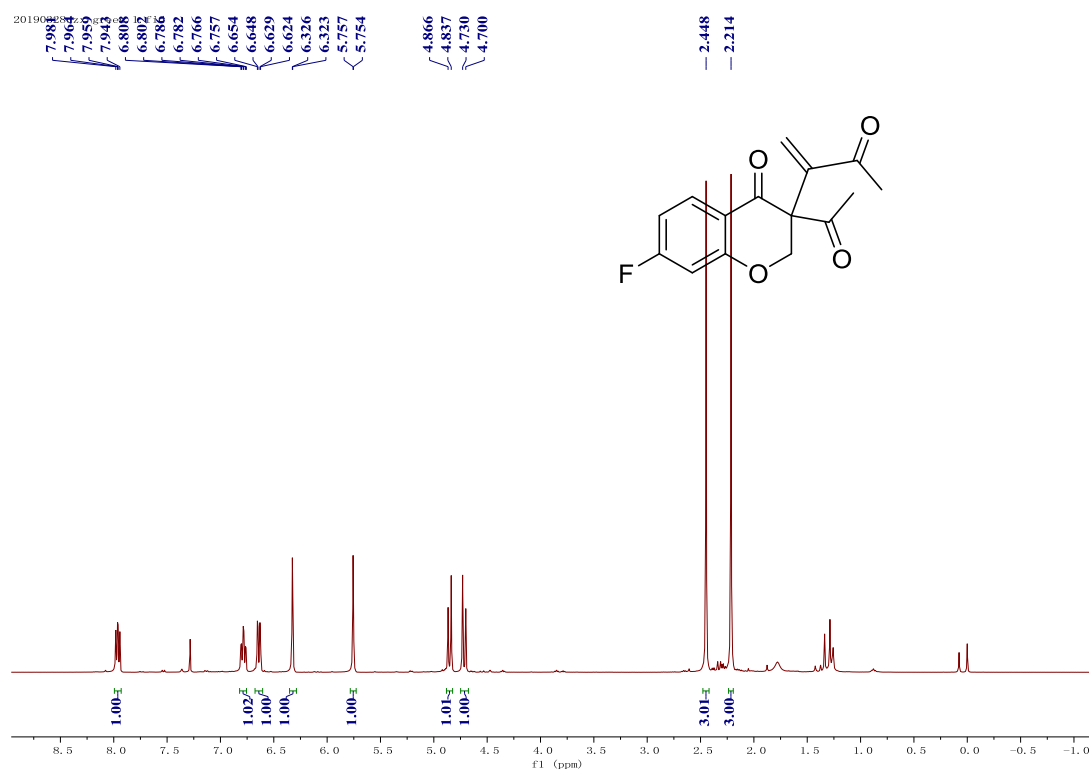

### Product 3l: <sup>13</sup>C NMR

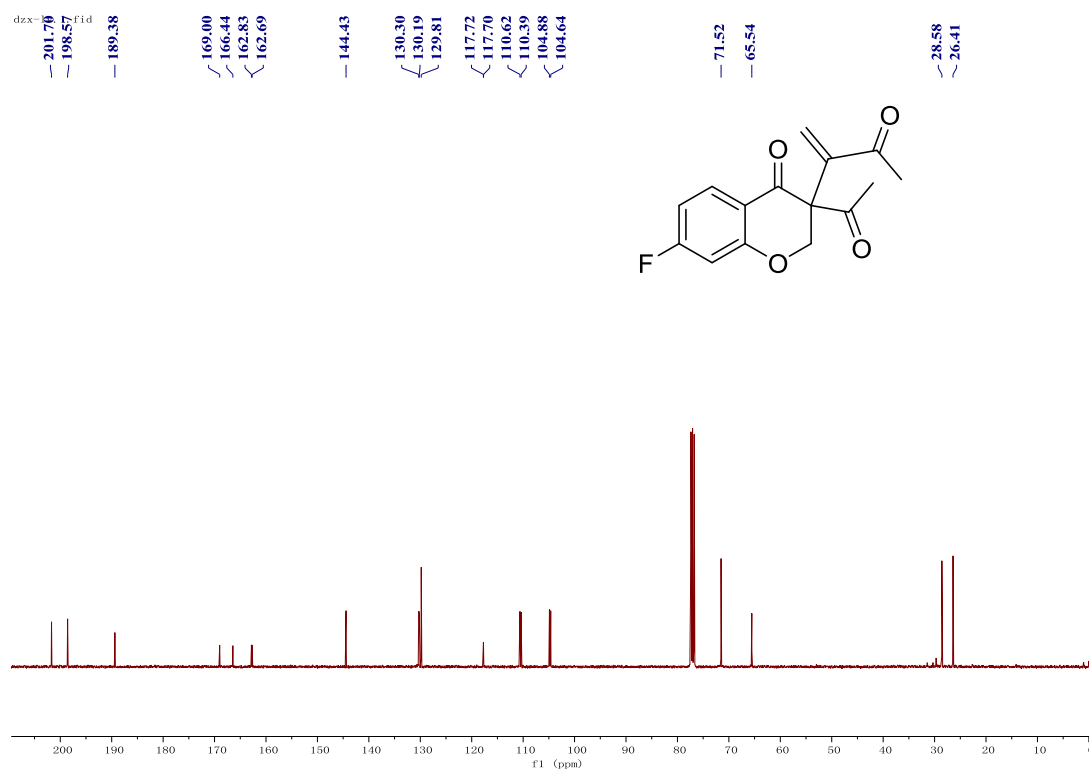

## Product 3m: <sup>1</sup>H NMR

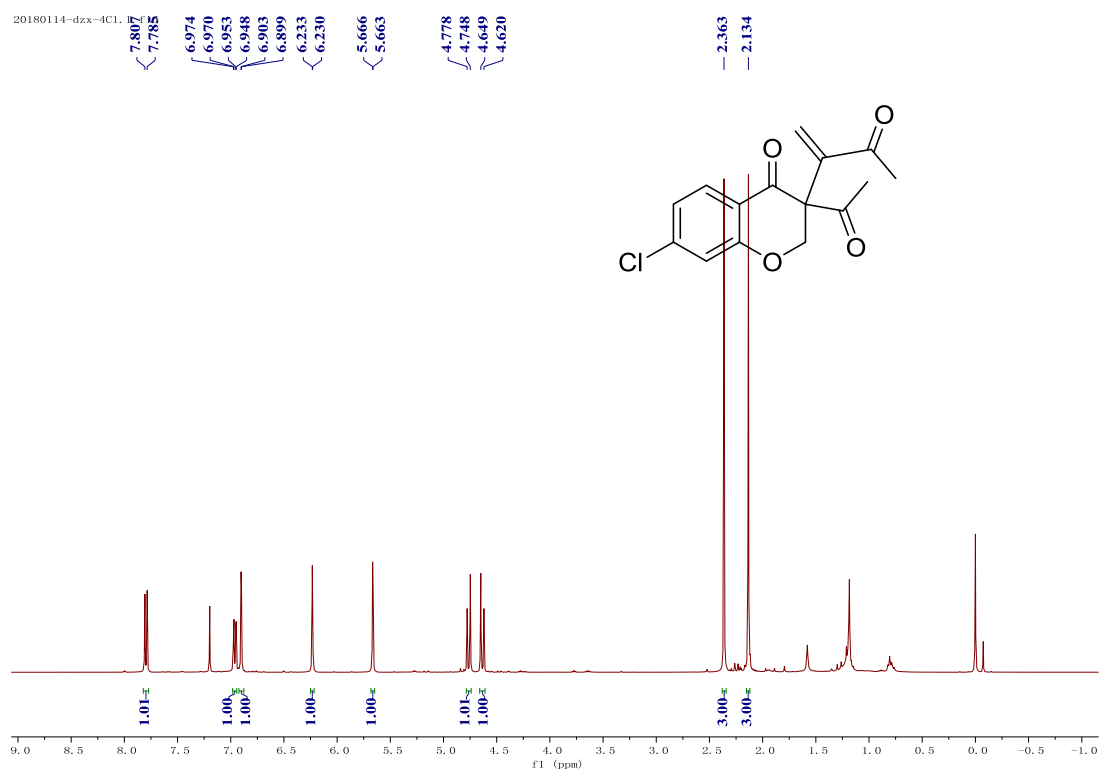

## Product 3m: <sup>13</sup>C NMR

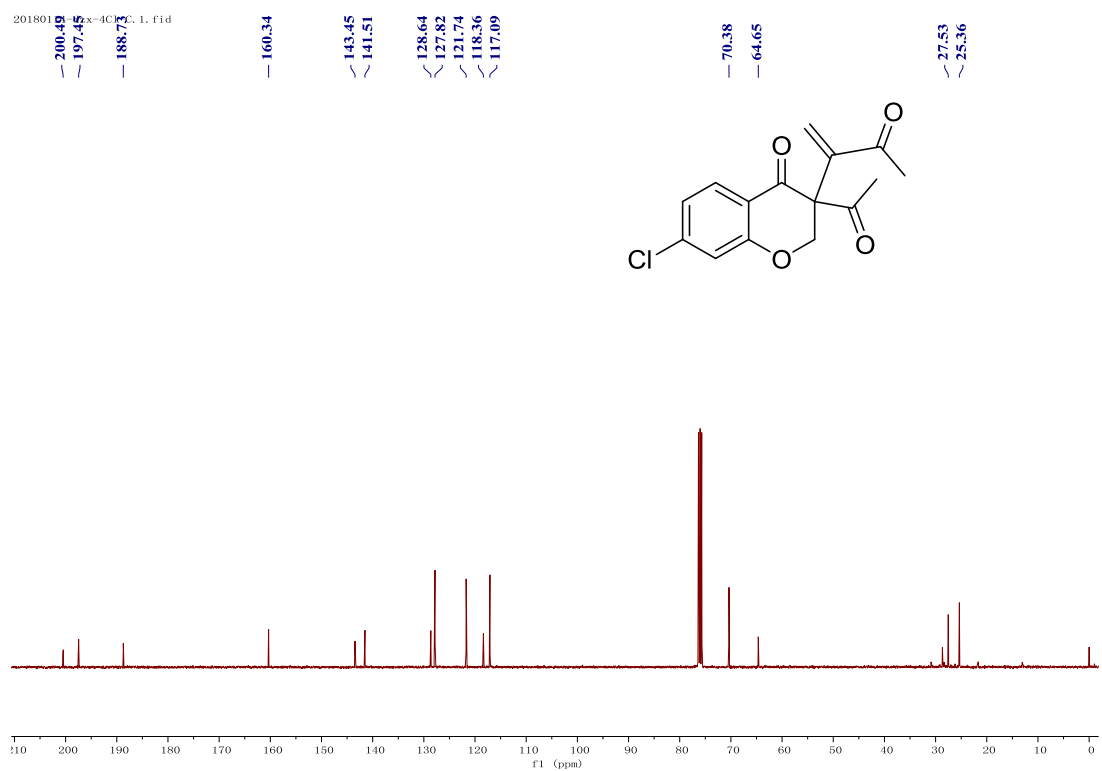

## Product 3n: <sup>1</sup>H NMR

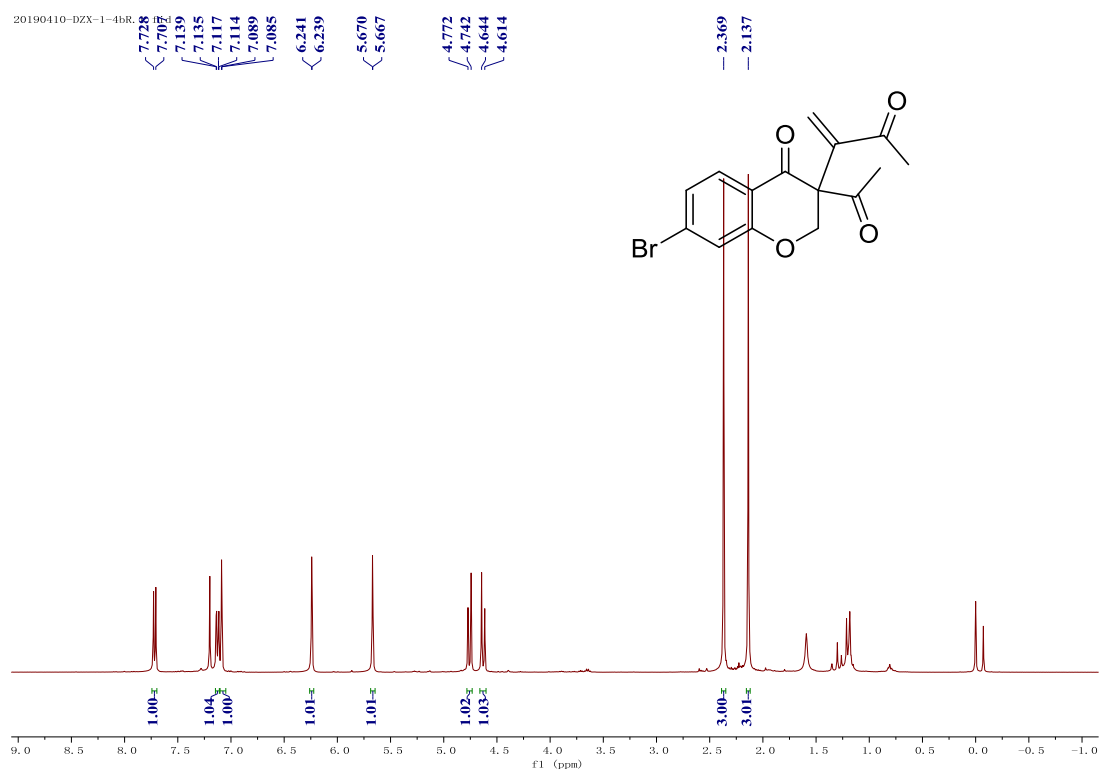

## Product 3n: <sup>13</sup>C NMR

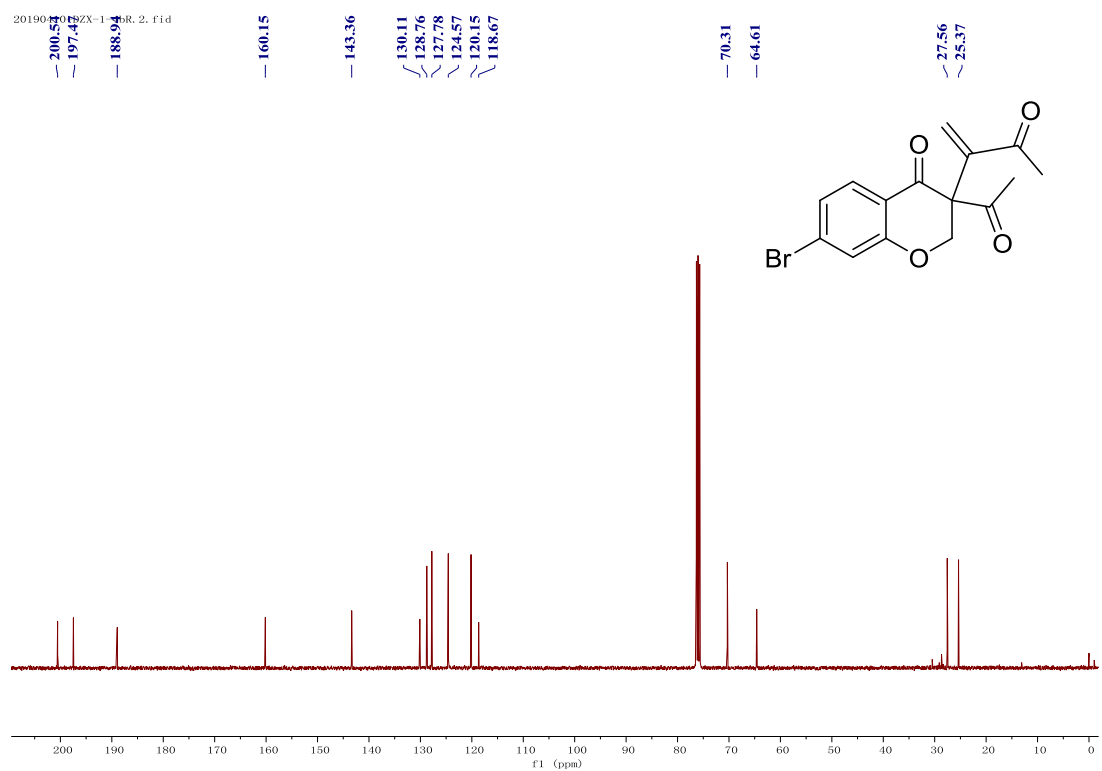

### Product 3o: <sup>1</sup>H NMR

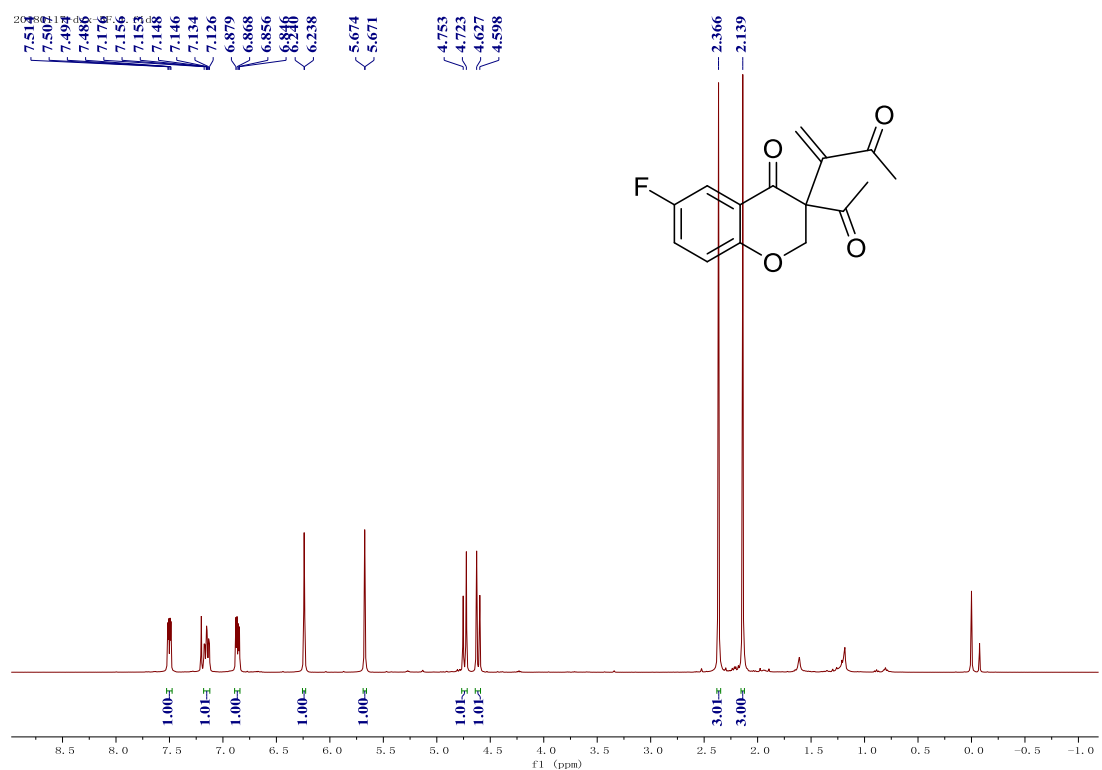

### Product 3o: <sup>13</sup>C NMR

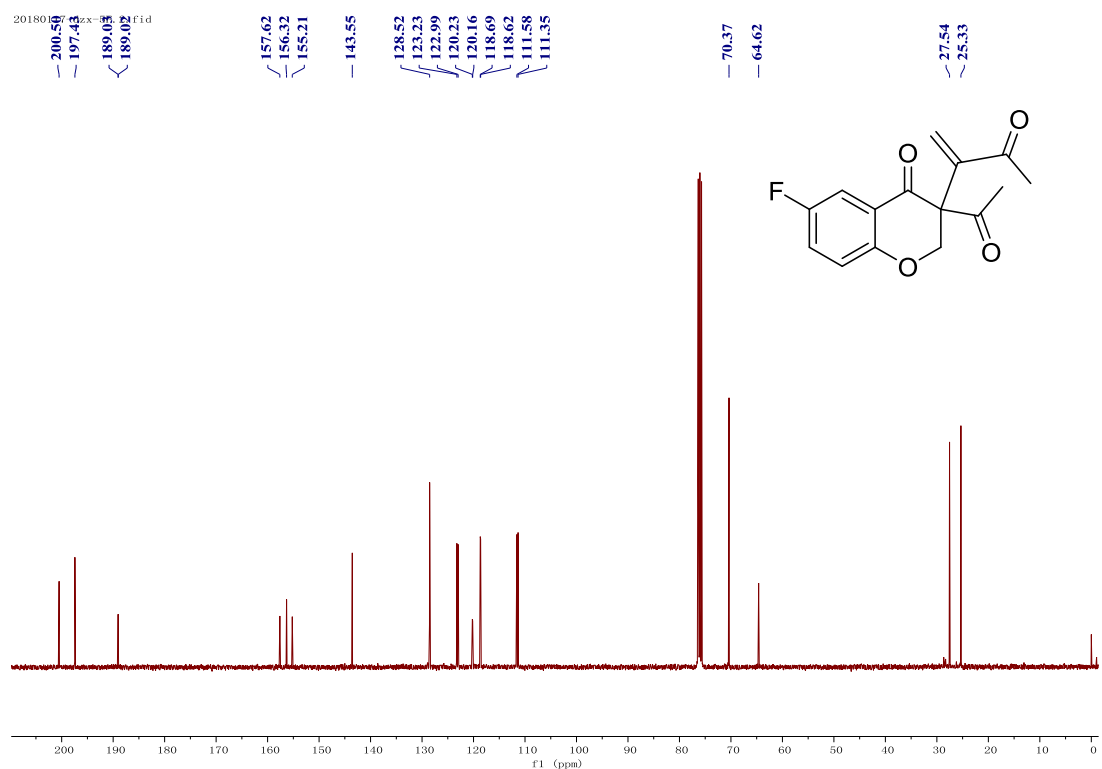

## Product 3p: <sup>1</sup>H NMR

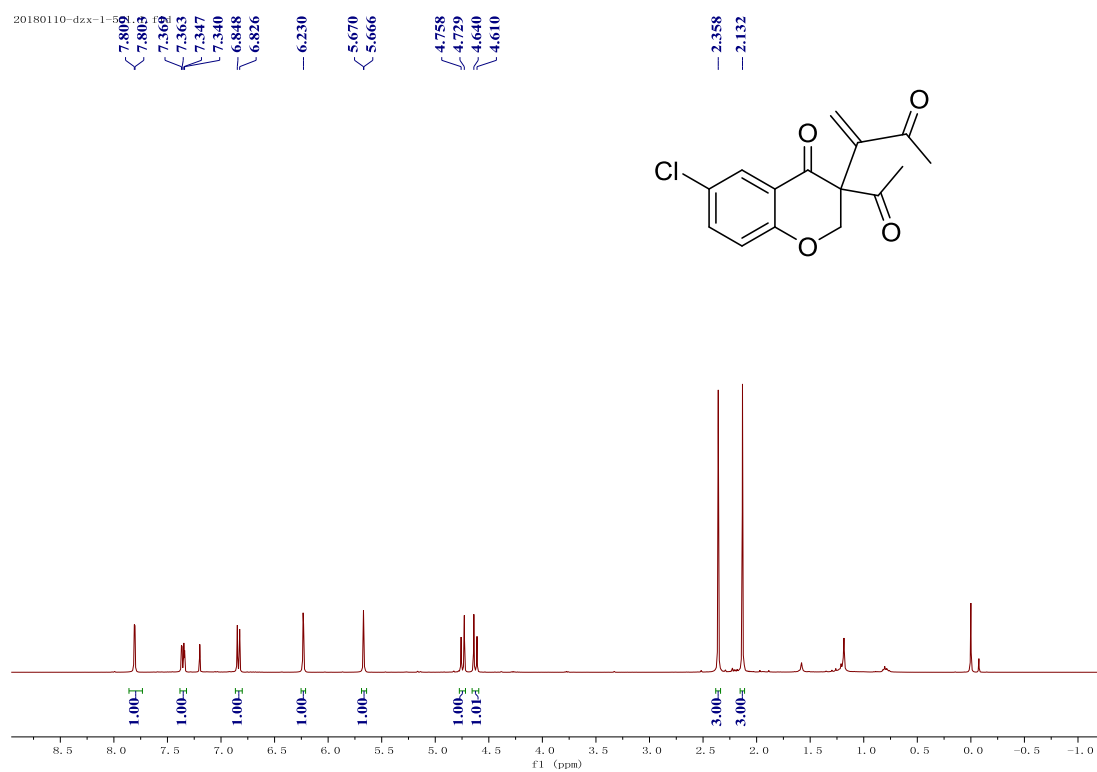

## Product 3p: <sup>13</sup>C NMR

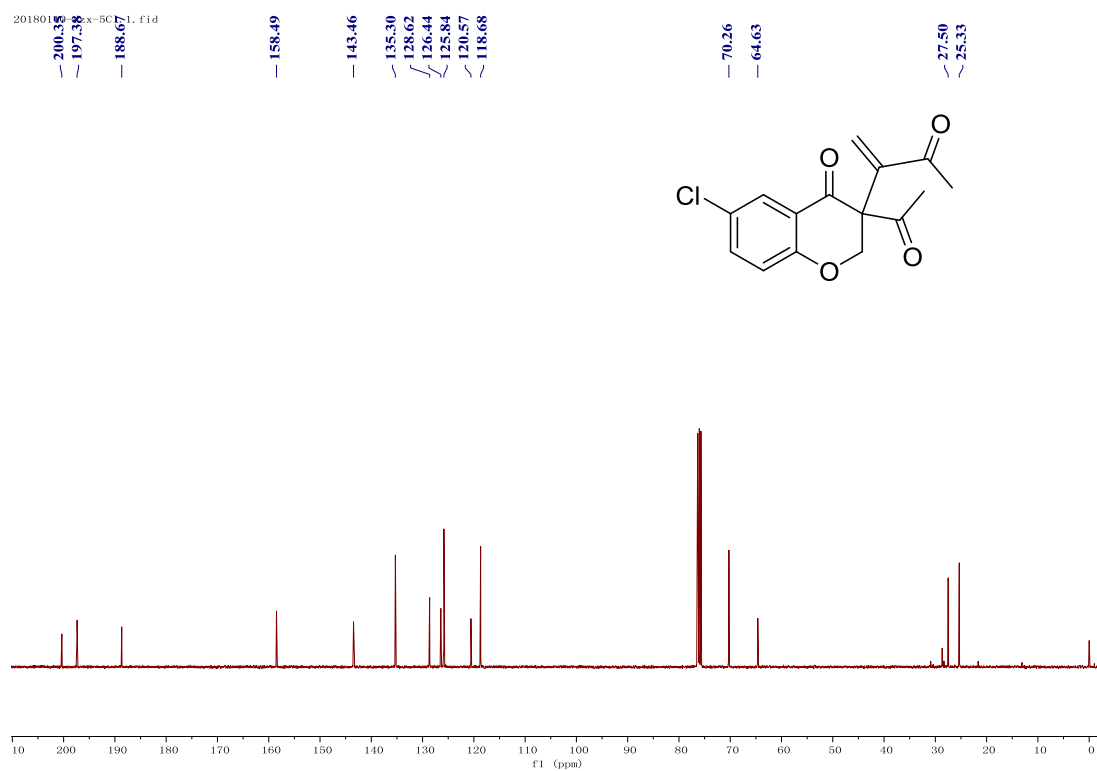



### Product 3q: <sup>1</sup>H NMR

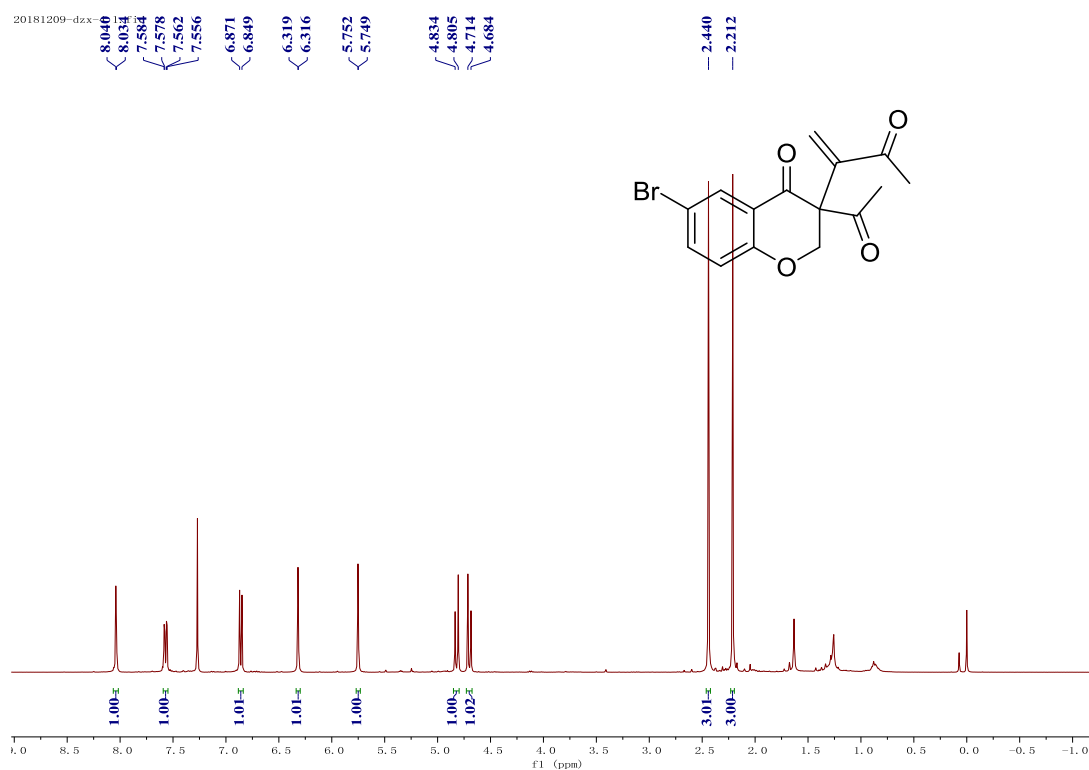

### Product 3q: <sup>13</sup>C NMR

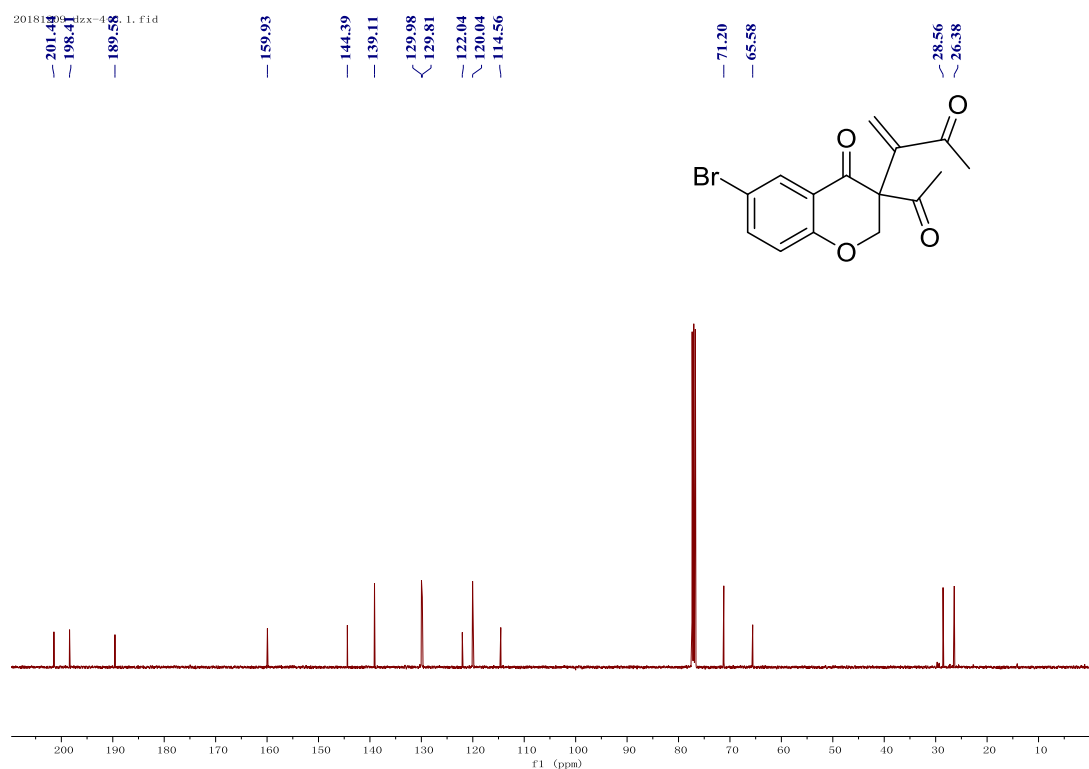

### Product 3r: <sup>1</sup>H NMR

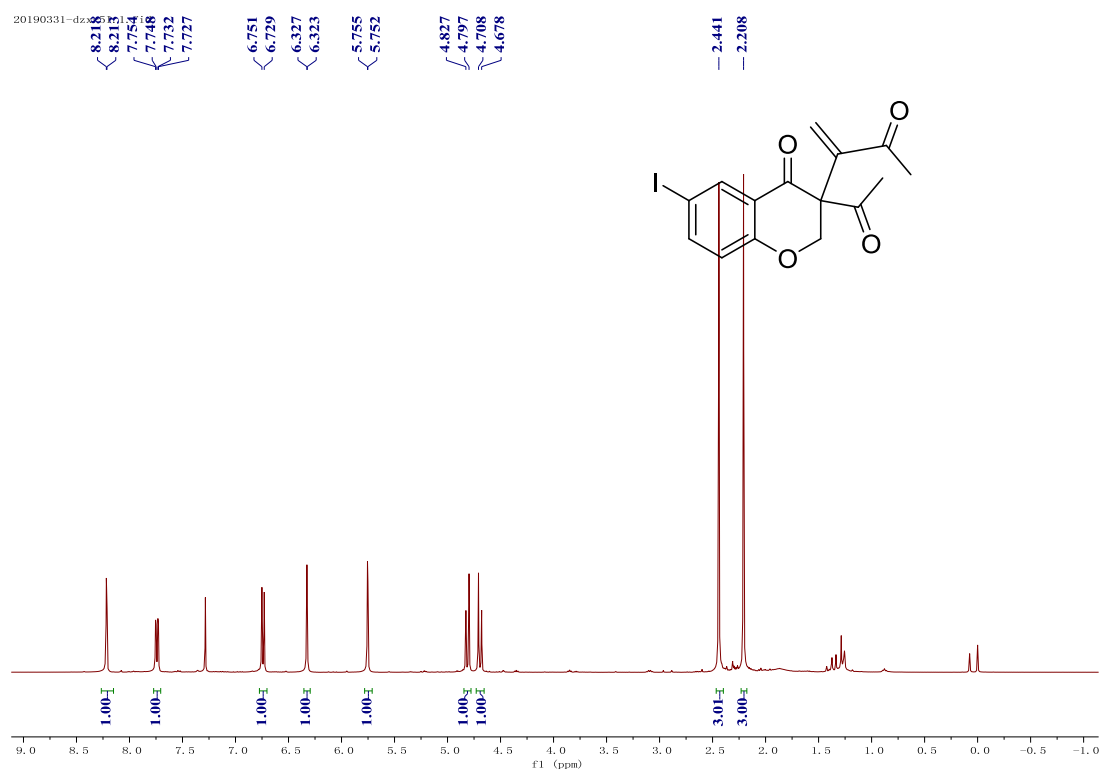

### Product 3r: <sup>13</sup>C NMR

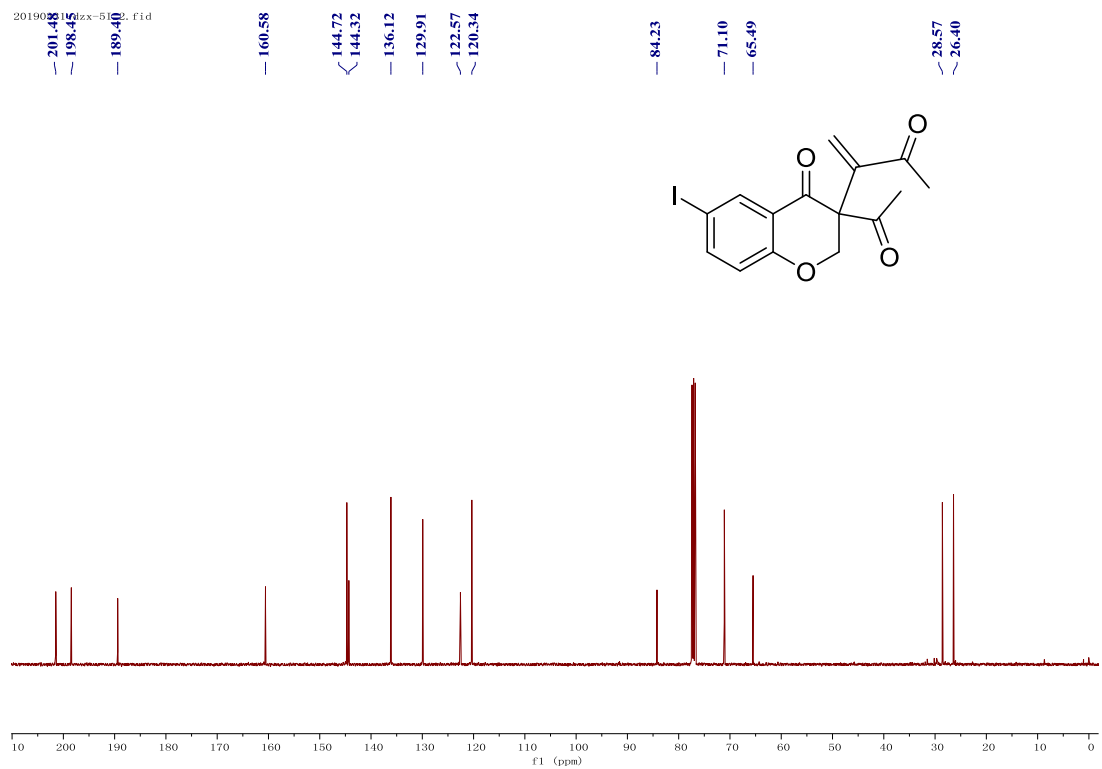

# Product 3s: <sup>1</sup>H NMR

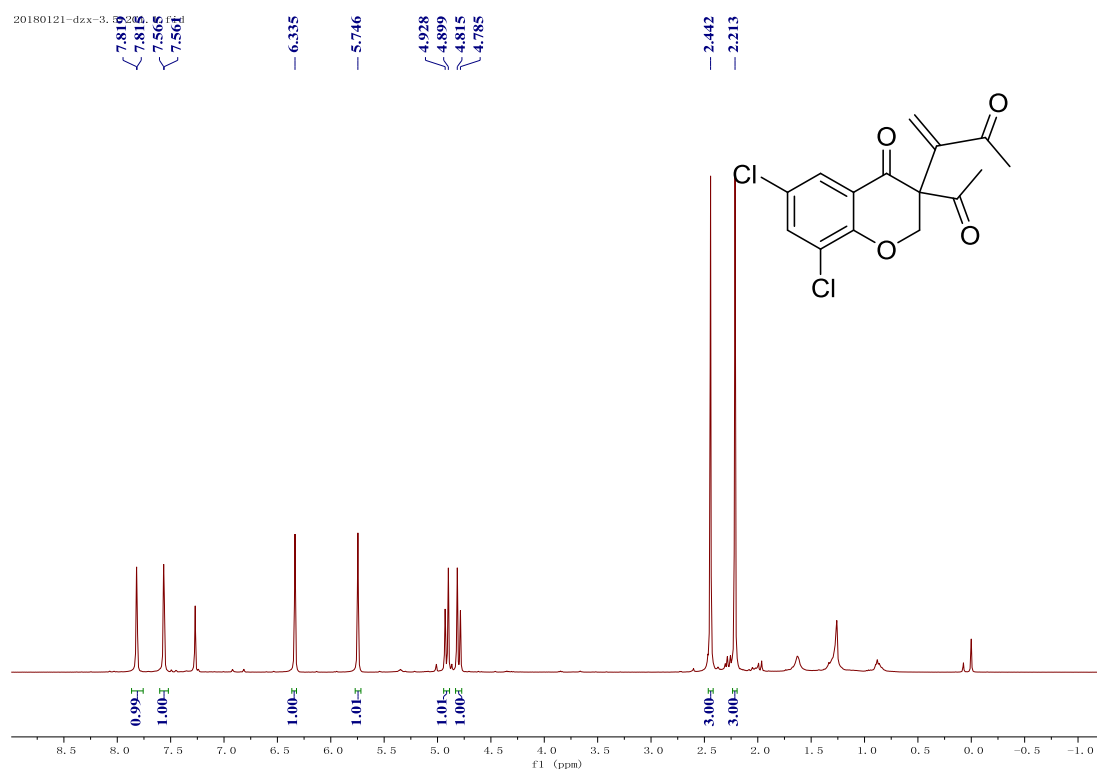

# Product 3s: <sup>13</sup>C NMR

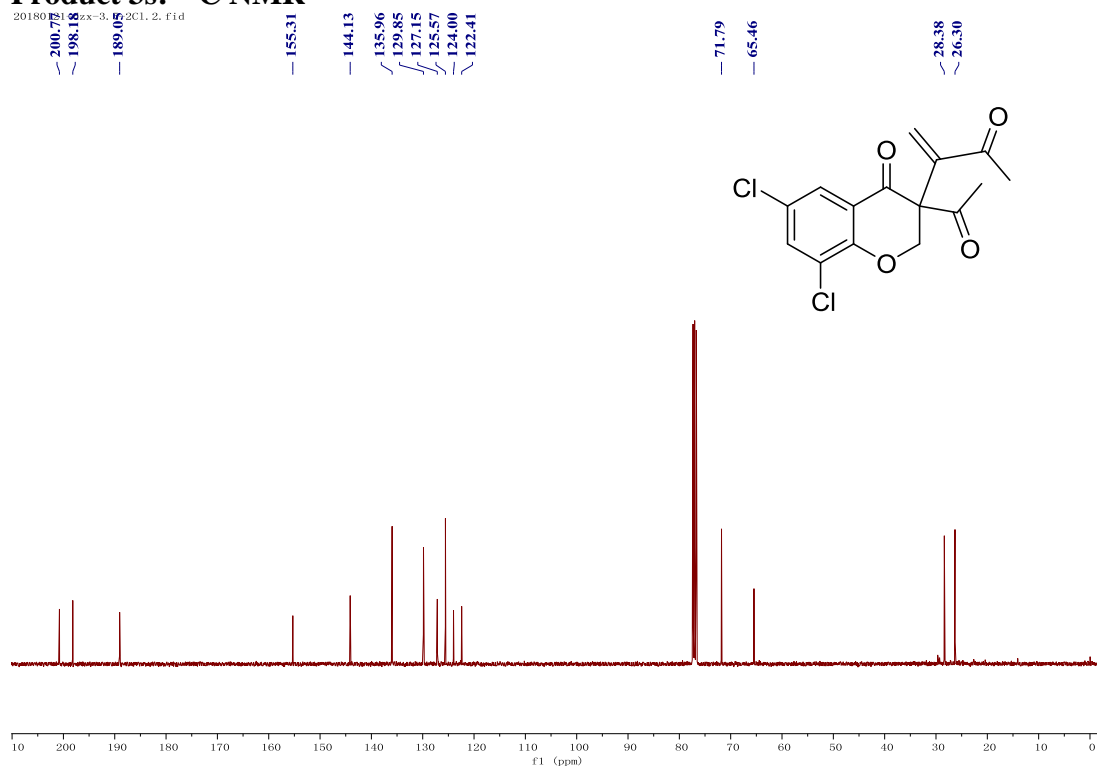

### Product 3t: <sup>1</sup>H NMR

xz-ch-6. 1. f1d

8.008  
8.002  
7.863  
7.857

6.339

5.748

4.926  
4.896  
4.811  
4.781

2.444  
2.212

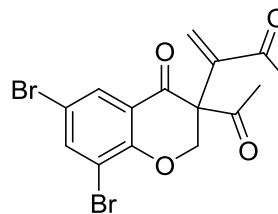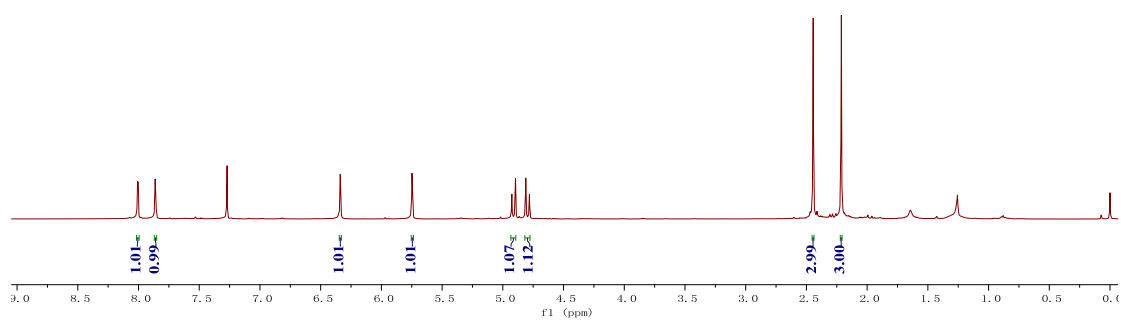

### Product 3t: <sup>13</sup>C NMR

xz-ch-6. 1. f1d

200.84  
198.21  
188.95

156.61

144.07  
141.51

129.97  
129.40  
122.72

114.43  
112.83

71.75  
65.29

28.43  
26.34

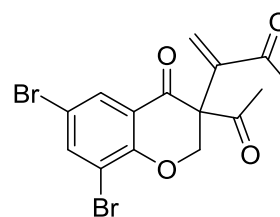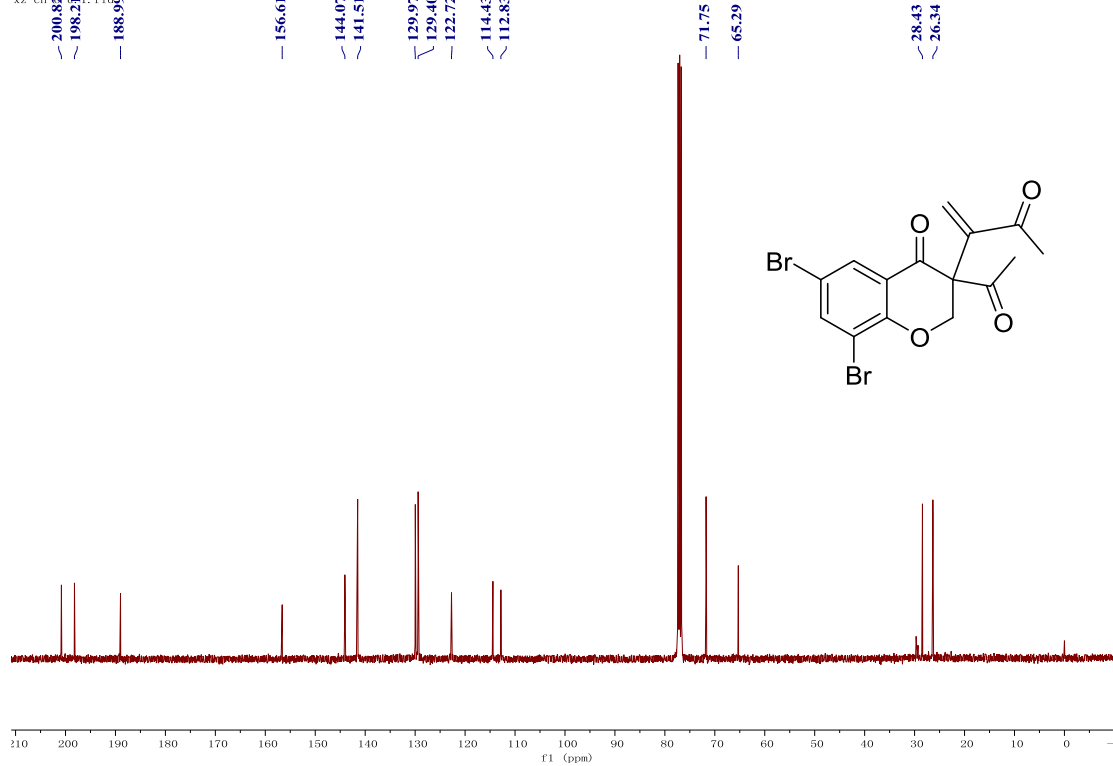

### Product 3u: $^1\text{H}$ NMR

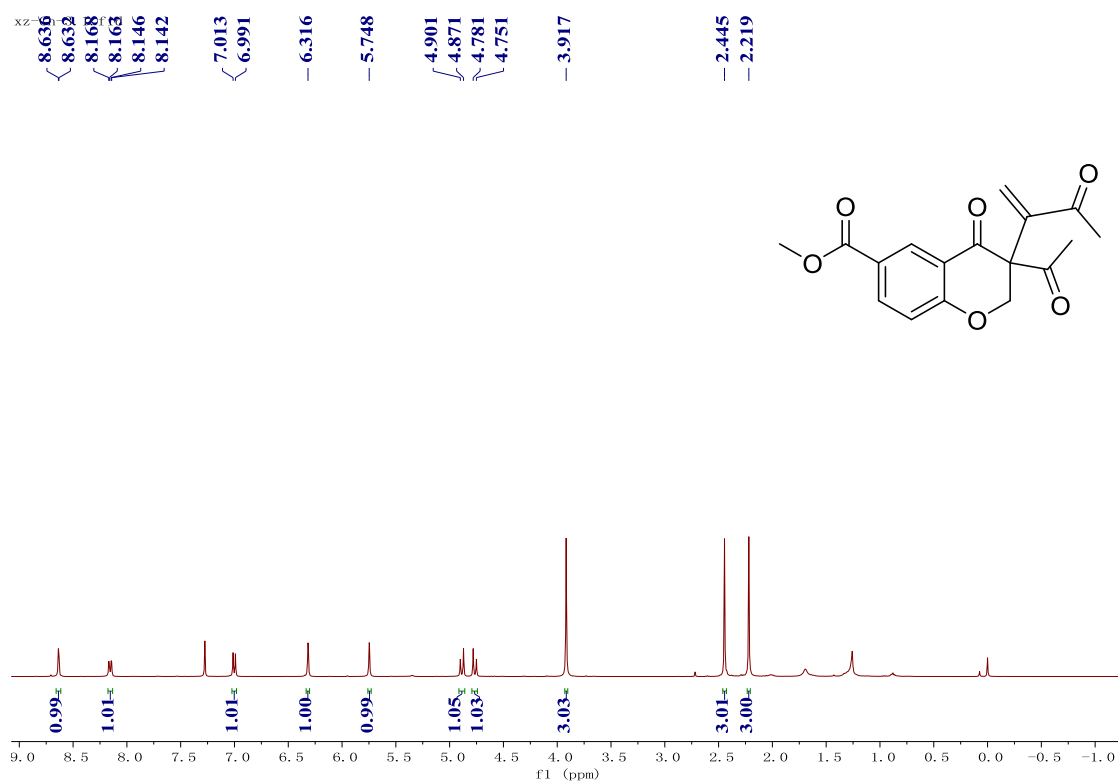

### Product 3u: $^{13}\text{C}$ NMR

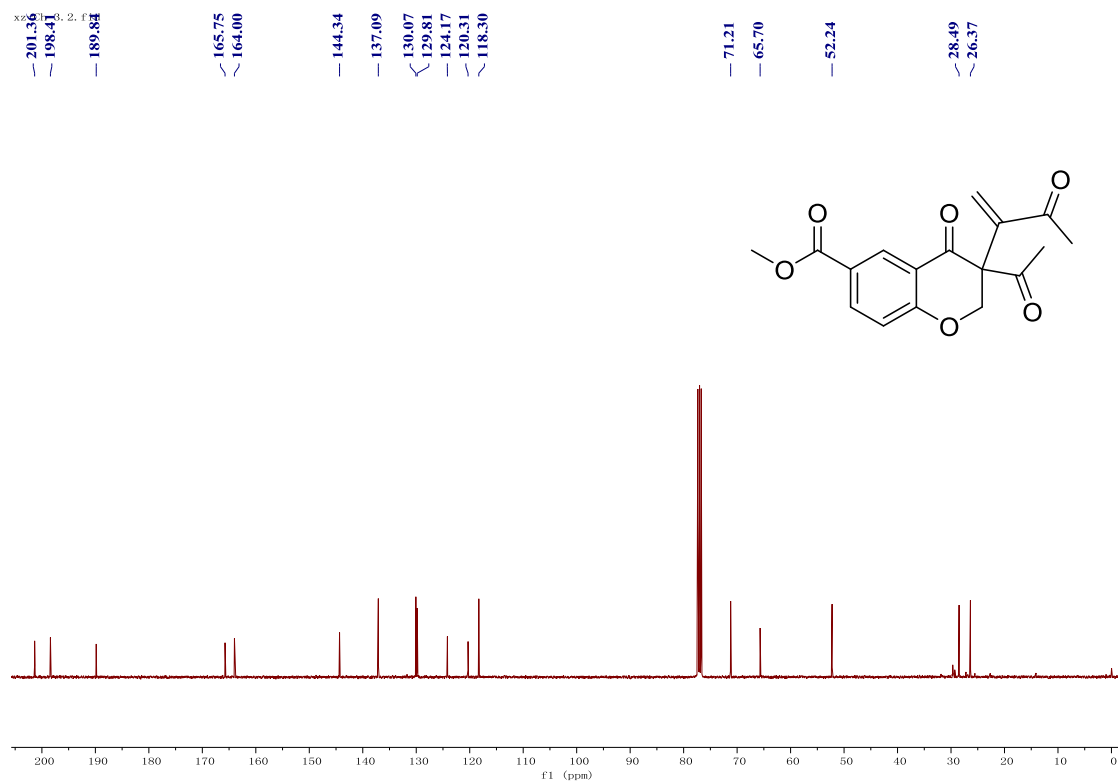

### Product 3v: <sup>1</sup>H NMR

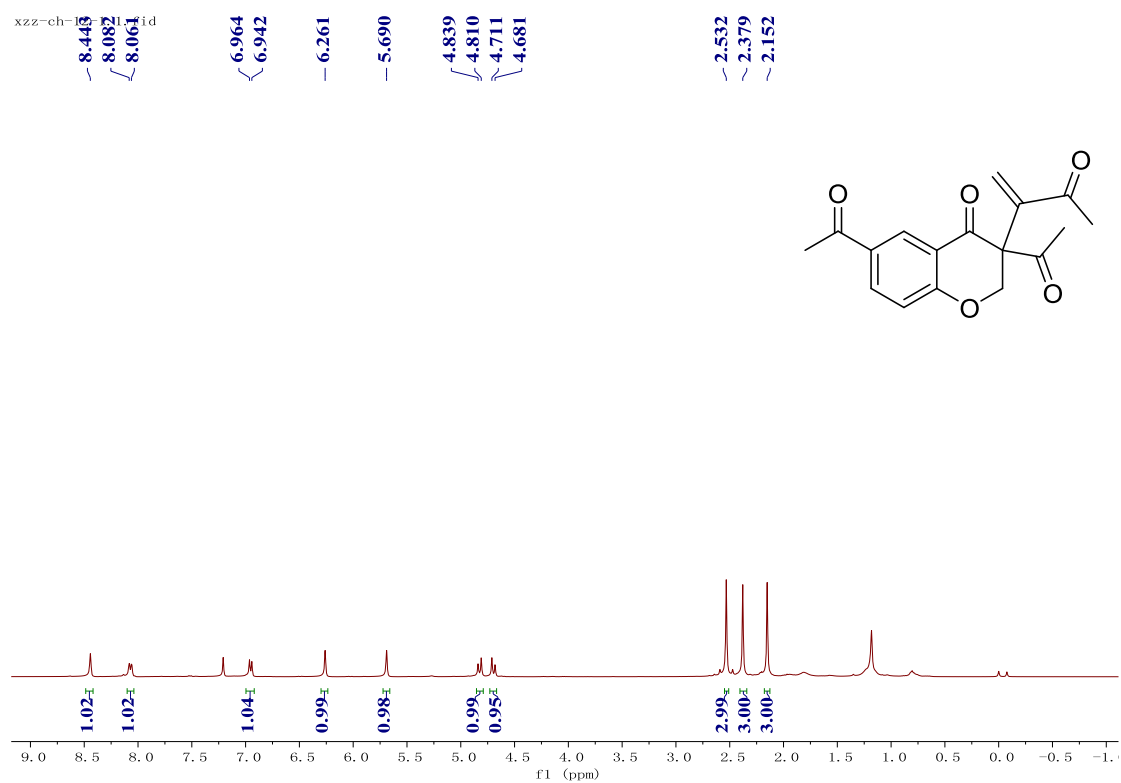

### Product 3v: <sup>13</sup>C NMR

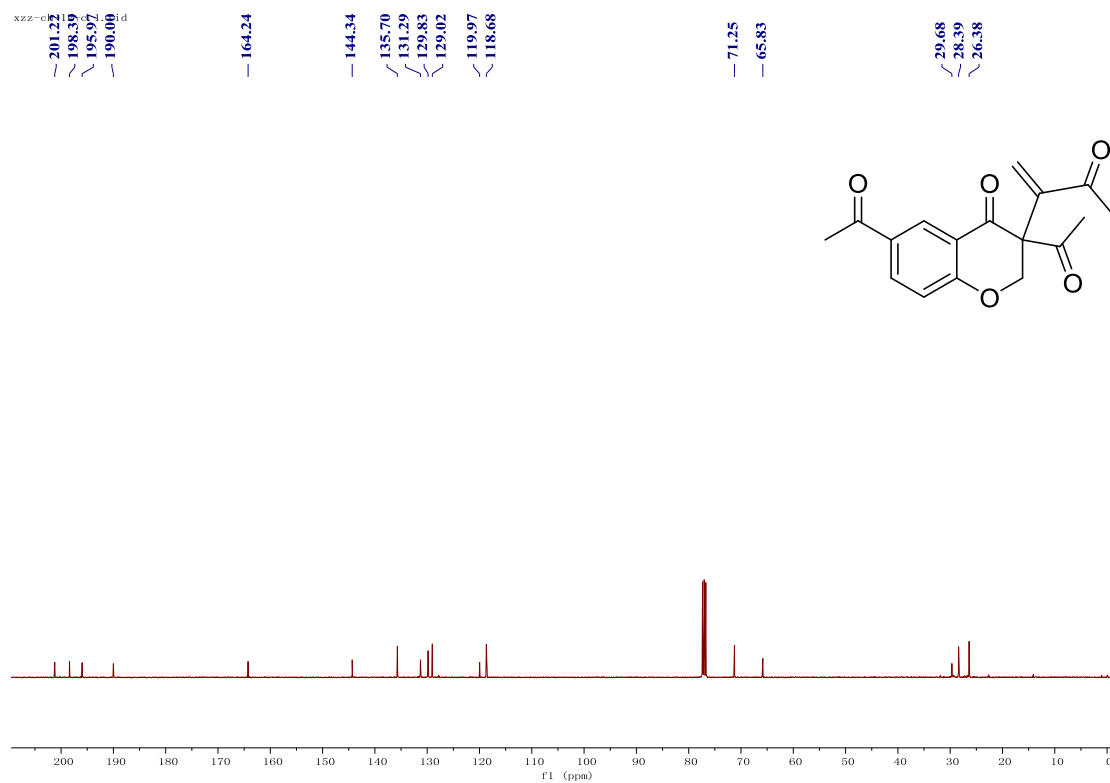

### Product 3w: <sup>1</sup>H NMR

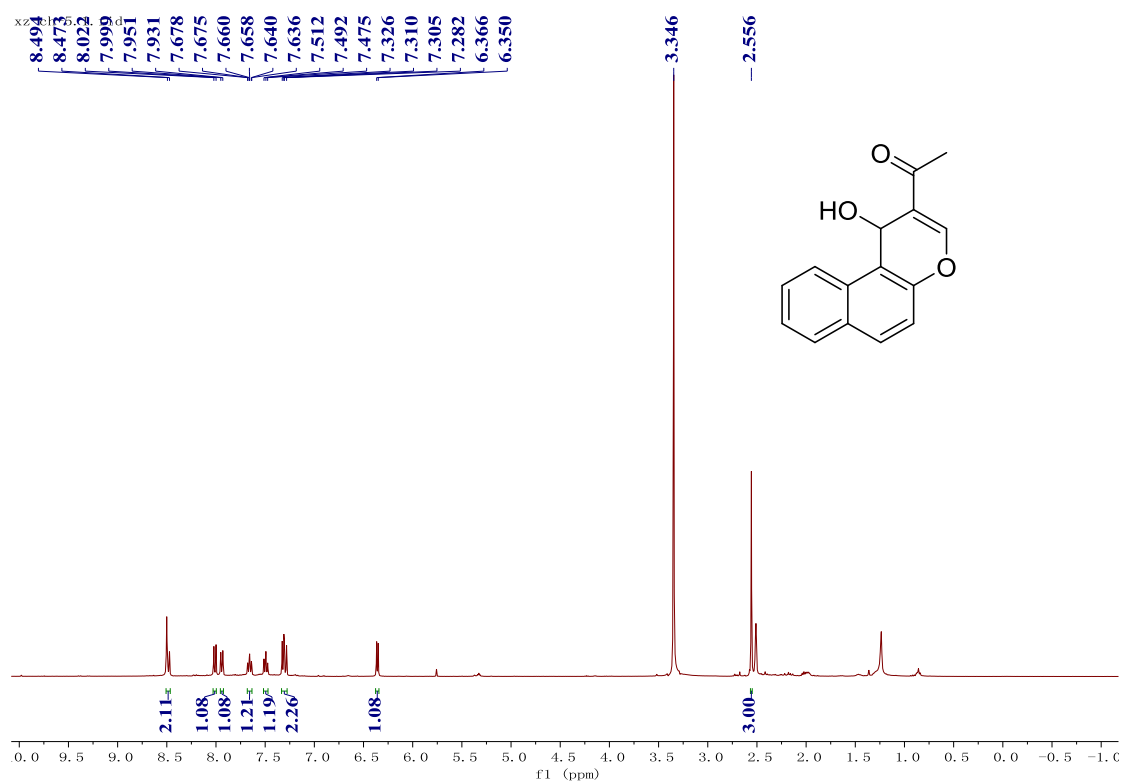

### Product 3w: <sup>13</sup>C NMR

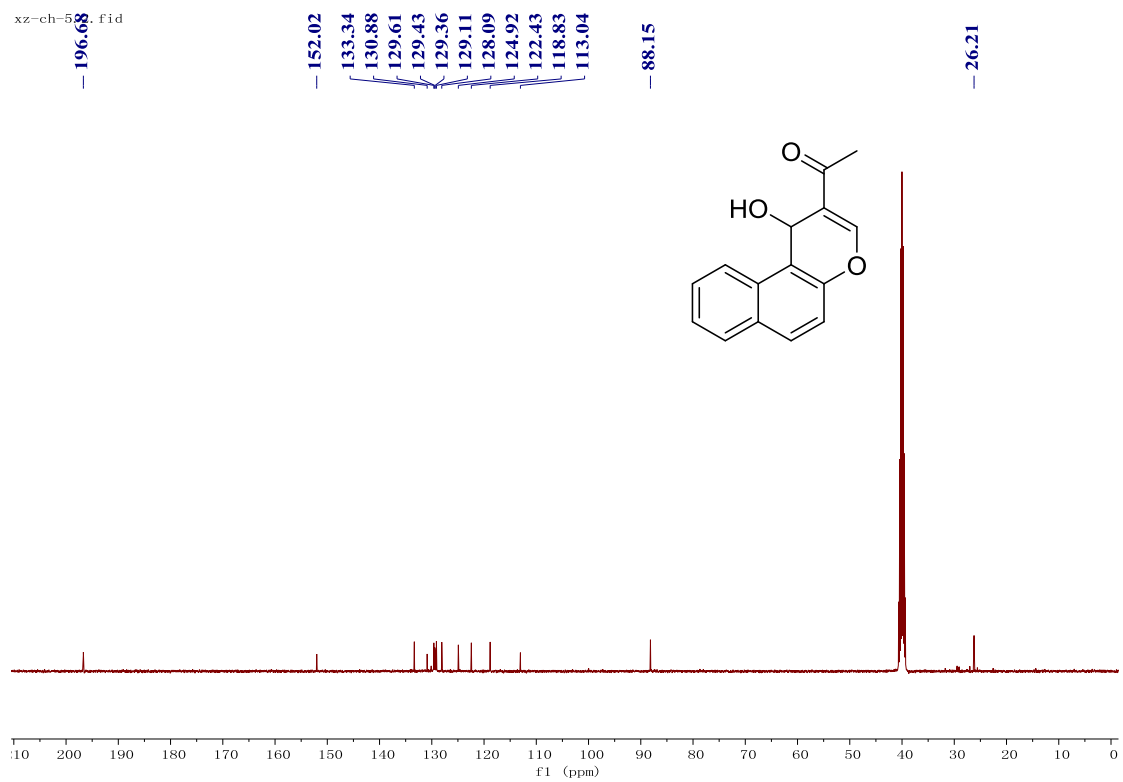

## 8. Crystal structure of product 3s (CCDC: 1948700) for absolute determination

### Datablock: ja

---

Bond precision: C-C = 0.0026 Å                      Wavelength=0.71073

Cell:                      a=11.3742(4)                      b=18.0280(7)                      c=7.5166(3)  
                                    alpha=90                      beta=106.736(2)                      gamma=90

Temperature:                      296 K

|                        | Calculated     | Reported              |
|------------------------|----------------|-----------------------|
| Volume                 | 1476.02(10)    | 1476.02(10)           |
| Space group            | P 21/c         | P2(1)/c               |
| Hall group             | -P 2ybc        | ?                     |
| Moiety formula         | C15 H12 Cl2 O4 | ?                     |
| Sum formula            | C15 H12 Cl2 O4 | C2.50 H2 Cl0.33 O0.67 |
| Mr                     | 327.15         | 54.52                 |
| Dx, g cm <sup>-3</sup> | 1.472          | 1.472                 |
| Z                      | 4              | 24                    |
| Mu (mm <sup>-1</sup> ) | 0.451          | 0.451                 |
| F000                   | 672.0          | 672.0                 |
| F000'                  | 673.50         |                       |
| h, k, lmax             | 14, 23, 9      | 14, 23, 9             |
| Nref                   | 3462           | 3386                  |
| Tmin, Tmax             | 0.897, 0.914   |                       |
| Tmin'                  | 0.873          |                       |

Correction method= Not given

Data completeness= 0.978                      Theta (max)= 27.730

R(reflections)= 0.0451( 2894)                      wR2(reflections)= 0.1359( 3386)

S = 1.052                      Npar= 198

---
